1 **Full title:**

2 The urinary microbiota composition remains stable over time and under various storage conditions

3

4 **Short title:**

5 Effect of storage and time on urine microbiota

6

7 **Authors:**

8 Caspar Bundgaard-Nielsen<sup>1,2¶</sup>, Nadia Ammitzbøll<sup>1,2¶</sup>, Yusuf Abdi Isse<sup>1,3</sup>, Abdisalam Muqtar<sup>1,3</sup>, Ann-Maria Jensen<sup>1</sup>,

9 Peter Leutscher<sup>1,2</sup>, Louise Thomsen Schmidt Arenholt<sup>1,2,4</sup>, Søren Hagstrøm<sup>1,2,5</sup>, Suzette Sørensen<sup>1,2\*</sup>

10

11 <sup>1</sup>Centre for Clinical Research, North Denmark Regional Hospital, Denmark

12 <sup>2</sup>Department of Clinical Medicine, Aalborg University, Denmark

13 <sup>3</sup>Department of Health Science and Technology, Aalborg University, Denmark

14 <sup>4</sup>Department of Gynecology and Obstetrics, North Denmark Regional Hospital, Denmark

15 <sup>5</sup>Department of Pediatrics, Aalborg University Hospital, Denmark

16

17 \* Corresponding author

18 E-mail: [Suzette.soerensen@rn.dk](mailto:Suzette.soerensen@rn.dk) (SES)

19

20 ¶ These authors have contributed equally to this study

21

22 **Keywords:** Microbiota, Microbiome, Urinary Microbiome, Urinary Microbiota, Bacteria, Urine Storage,

23 Microbiota Storage, Bacteria DNA Extraction

## 24 **Abstract:**

25 *Background:* New sensitive techniques have revealed a large population of bacteria in the human urinary tract,  
26 challenging the perception of the urine of healthy humans being sterile. While the role of this urinary microbiota  
27 is unknown, dysbiosis has been linked to disorders like urgency urinary incontinence and interstitial cystitis.  
28 When comparing studies it is crucial to account for possible confounders introduced due to methodological  
29 differences. Here we investigated whether storage condition or time of collection, had any impact on the urinary  
30 microbial composition.

31 *Results:* For comparison of different storage conditions, urine was collected from five healthy adult female  
32 donors, and analyzed by 16S rRNA gene sequencing. Using the same methods, the daily or day-to-day variation  
33 in urinary microbiota was investigated in nineteen healthy donors, including four women, five men, five girls,  
34 and five boys. With the exception of two male adult donors, none of the tested conditions gave rise to significant  
35 differences in alpha and beta diversities between individuals. *Conclusion:* The composition of the urinary  
36 microbiota was found to be highly resilient to changes introduced by storage temperature and duration. In  
37 addition, we did not observe any intrapersonal daily or day-to-day variations in microbiota composition in  
38 women, girls or boys.

39 Together our study supports flexibility in study design, when conducting urinary microbiota studies.

40

## 41 **Author summary**

42 The discovery of bacteria native to the urinary tract in healthy people, a location previously believed to be sterile,  
43 has prompted research into the clinical potential of these bacteria. However, methodological weaknesses can  
44 significantly influence such studies, and thus development of robust techniques for investigating these bacteria  
45 are needed. In the present study, we investigated whether differences in storage following collection, could

46 affect the bacterial composition of urine samples. Next, we investigated if this composition exhibited daily or  
47 day-to-day variations.

48 Firstly, we found, that the bacterial composition of urine could be maintained by storage at -80 °C, -20 °C, or  
49 refrigerated at 4 °C. Secondly, the bacterial composition of urine remained stable over time. Overall, the results  
50 of this study provide information important to study design in future investigations into the clinical implications  
51 of urinary bacteria.

52

## 53 **Background**

54 It has been established that the human body has a symbiotic relationship with an abundance of microorganisms,  
55 which play a role in maintenance of health. In particular, microorganisms present in the gut have received much  
56 attention, and many studies have described their beneficial functions in immune regulation[1,2] and metabolic  
57 processes[3]. However, when brought out of balance (dysbiosis), the same microorganisms have been associated  
58 with several pathological states including infections[4], autoimmune diseases[5], obesity[6], and psychiatric or  
59 neurodevelopmental disorders[7–9].

60 Until recently, it was believed that urine under normal conditions was sterile. This has now been challenged by  
61 sensitive PCR-based techniques including 16S rRNA gene sequencing and expanded quantitative urine culture  
62 (EQUC). Studies are now emerging, investigating the urinary microbiota in various patient groups and healthy  
63 participants, showing that urine contains a plethora of bacteria with yet unknown function[10–12]. Most studies  
64 published on urinary microbiota are primarily on women, fewer on men[13] and only a single on young  
65 children[14]. In general, the core microbiota composition is very different between women and men. The urine  
66 of women is mainly dominated by *Lactobacillus* followed by *Gardnerella* genera[11,13,15–17]. Men have a more  
67 diverse bacterial composition consisting of broader representation of different genera including *Lactobacillus*,  
68 *Corynebacterium*, *Staphylococcus*, and *Prevotella*[13,18–23]. It is assumed that these bacteria provide healthy

69 functioning of the lower urinary tract. Notably, several studies have recently documented that an alteration in  
70 urinary microbiota correlates to diseases in the lower urinary tract, including urgency urinary incontinence[10–  
71 12,24] and interstitial cystitis[15,25]. More knowledge on the urinary microbiota may therefore help us to  
72 understand the etiology behind diseases of the lower urinary tract.

73 Despite the growing interest for urinary microbiota research, it appears that the methodologies and study  
74 designs, used in different studies, are highly heterogeneous, which makes it difficult to interpret and compare  
75 observed findings. Several protocol optimization studies have been conducted on fecal samples, providing  
76 valuable guidelines on how to store and process samples for gut microbiota studies[26–31]. Importantly, the  
77 chemical content and structure of urine is very different from feces, leaving urinary microbiota research as a bare  
78 and unexplored field regarding protocol recommendations. In fact, few studies have investigated the technical  
79 and methodological aspects of urine microbiota research[19,32–34]. These mainly focused on the urine  
80 collection method. e.g., suprapubic aspiration, clean-catch midstream, or transurethral catheterization sample  
81 collection. However, only a single study investigated how different temperatures and use of a stabilization buffer  
82 could affect the urinary microbiota in healthy women[34]. None of the studies has taken into consideration  
83 whether the microbiota remains stable over time.

84 We aimed to determine if different urine storage temperatures could influence microbiota composition in  
85 healthy women. Furthermore, we investigated if the urinary microbiota remained stable throughout the day or  
86 between two different days in healthy women, men, and children.

87

## 88 **Results**

### 89 **Different storage conditions do not critically affect bacterial composition**

90 Due to the risk of DNA degradation or bacterial growth, the ideal sampling strategy for urine microbiota analyses  
91 would be to purify DNA immediately following urination, or to transfer the urine samples directly to -80 °C or

92 colder. This is however not always possible or practical in a clinical setting, or when utilizing self-sampling at the  
93 home of the study participants. We therefore tested if storage of urine at different sub-optimal temperatures,  
94 altered the microbiota composition compared to a freshly processed sample. For this purpose, urine was  
95 collected from five healthy donors. Each urine sample was subsequently divided and stored according to one of  
96 the seven combinations of temperatures and times (Fig 1). Since each condition was tested in duplicate  
97 experiments, we reached a total of 70 samples. After the allocated storage period, total DNA was purified, and  
98 DNA concentrations obtained ranged from 16.2-248.0 ng/mL urine with minor variations between donors (Fig  
99 2). With the exception of donor E, the highest DNA concentration was observed in the freshly processed sample,  
100 followed by samples stored directly at -80 °C.

101 16S rRNA gene sequencing of the V4 region resulted in a total of 2,097,325 reads (median 29,334, range 1299 -  
102 132,881 reads per sample). 933 unique Operational taxonomic units (OTUs) were identified (median 106, range  
103 33 - 502 OTUs per sample), with taxonomy assigned on the phylum level for 96.1 % of OTUs and genus level for  
104 53.2 %. A rarefaction curve was generated, and used to deselect samples that did not adequately cover all unique  
105 OTUs and therefore showed insufficient sequencing coverage (Fig 3A). Consequently, three samples were  
106 removed. Four samples were furthermore discarded based on poor duplicate comparison (Fig 3B and 3C),  
107 probably caused by background contamination due to low-biomass samples. This led to a total of 63 samples  
108 being included in the following analyses.

109 Different storage conditions did not result in significant differences in alpha diversity metrics, including OTU  
110 richness (Fig 4A) and Shannon diversity (Fig 4B). This indicated that bacterial growth was limited. Interestingly,  
111 when looking at beta diversity it appears that variations between storage conditions are minor compared to  
112 interpersonal variations (Fig 5). This supports, therefore the validity of using other storage conditions, for urine  
113 microbiota analyses, than normal gold standard conditions.

114

## 115 **Urine microbiota composition is independent of daily and day-to-day variation**

116 First morning urine is often more concentrated than subsequent urine samples throughout the day, while  
117 differences in daily routines (e.g. sleep rhythm, diet, sexual activity or exercise) may introduce variations during  
118 the day. We therefore speculated that morning urine could contain higher bacterial loads, and possibly a  
119 different bacterial composition than urine collected in the evening. To test this hypothesis, we compared urine  
120 samples collected in the morning and evening on two independent days from 19 healthy donors (4 women, 5  
121 men, 5 girls, and 5 boys). Following DNA extraction, the resulting DNA yield ranged from <2 to 218.25 ng per mL  
122 urine. Importantly, DNA yield did not differ based on within day or day-to-day (data not shown).

123 Due to the collection method being performed under less controlled conditions (self-sampling by study  
124 participants), we expected a higher risk of contamination. In order to avoid false positive samples, we excluded  
125 samples that yielded less DNA following the initial PCR amplification for library preparation, compared to the  
126 negative controls (0.0538 ng/ $\mu$ L). 54 of the original 152 samples were below cut-off levels for 1<sup>st</sup> PCR library  
127 amplification. Deselected samples were distributed unevenly as none were from women, 16 (40 %) from girls,  
128 26 (65 %) from men, and 12 (30 %) from boys. The remaining 98 samples (representing 17 participants: 4 women,  
129 4 girls, 4 men and 5 boys) were available for microbiota comparisons. These all showed good sequencing  
130 coverage based on a rarefaction curve (data not shown). 16S rRNA gene sequencing resulted in a total of  
131 5,575,050 reads (median 52,232, range 7529 - 122,101 reads per sample) and 2,538 unique OTUs (median 216,  
132 range 109 – 469 OTUs per sample) were identified. 93.1 % were assigned to the phylum level and 50.9 % to the  
133 genus level.

134 Mapping of microbiota composition by 16S rRNA gene sequencing did not show any significant difference in OTU  
135 richness or Shannon diversity between urine samples collected in the morning or in the evening (Fig 6A and 6B)  
136 or on two independent days (Fig 8A and 8B). For beta diversity, we observed that, with the exception of the adult  
137 male participants 12 and 15, urine samples maintained similar bacterial compositions regardless of collection

138 time point (Fig 7 and 9). For participant 12, a marked bacterial difference between morning and evening samples  
139 was observed, and between morning and evening and weekend and weekdays for participant 15.

140

## 141 **Discussion**

142 One of the great challenges, when performing microbiota studies on biological specimens, is always the risk of  
143 introducing bias due to methodological vulnerabilities. Studies investigating potential pitfalls are therefore  
144 essential to identify confounding factors. Here we show that the urinary microbiota is remarkably stable under  
145 different storage conditions and with respect to time.

146 One major challenge, when investigating the urinary microbiota, is that only low amounts of DNA, and even  
147 lower amounts of bacterial DNA, can be extracted from urine[32]. A study by El Bali et al.[32] investigated DNA  
148 extraction from urine samples and found that storage temperature had a major impact on DNA output levels. In  
149 particular, they showed that storage at -20 °C gave rise to dramatically lower DNA yields compared to samples  
150 that were either stored directly at -80 °C or where DNA was immediately extracted. We did not observe the same  
151 level of DNA loss in samples stored at -20 °C compared to -80 °C, which may be explained by the longer storage  
152 time (15 days) used in El Bali et al. Storage at -20 °C for more than 72 hours may therefore compromise urinary  
153 DNA integrity. For gut microbiota studies, maintaining bacterial composition is essential. A previous study by  
154 Jung et al.[34] reported, that storage of urine samples without stabilizing buffer at -20 °C or 4 °C, maintained  
155 bacterial composition for up to 24 days. This matches the results of our study, allowing collection of urine  
156 samples at locations at distance from laboratory facilities.

157 For samples collected in the home of participants, we observed that a relatively high number of these were  
158 excluded due to low DNA yield following the initial PCR during library preparation. Importantly, the samples were  
159 not excluded due to lack of high quality sequencing reads, but merely because background contamination could  
160 not be ruled out. We have not encountered any urinary microbiota studies that describe exclusion of samples

161 based on background cut-off levels, which leaves the risk of misinterpretation of urinary bacterial loads or  
162 profiles.

163 Importantly, we found that the urinary microbiota composition remained stable across different time points.  
164 While microbiota resilience over time has previously been reported in the gut and saliva microbiota[35], this is,  
165 to our knowledge, the first study to demonstrate this for the urinary microbiota. This resilience alleviates  
166 concerns about timing of urine collection in future studies investigating the urinary microbiota.

167

168 Our study suffers from certain limitations. The experiments on the day-to-day and daily variations depended on  
169 self-sampling by the study participants in their homes, and are thereby performed in a less controlled  
170 environment. This can also be considered as a study strength, since home sampling is an often-used collection  
171 method in clinical experiments[36,37]. In fact, we show that the urinary microbiota is stable despite the use of  
172 home sampling. Only in two men did we observe inconsistency between morning/evening and  
173 weekday/weekend samples. This could be due to biologically relevant fluctuations in microbiota compositions  
174 or, more likely, due to contamination from vaginal microbiota of their partner through intercourse prior to urine  
175 sampling. In particular, we observe that aberrant microbiota profiles of these men showed similarities to the  
176 microbiota profiles of women (e.g. higher relative abundances of *Lactobacillus*). We did not collect data on sexual  
177 activity of the participants, which may be considered a potential confounding factor. Another limitation is the  
178 large amount of samples that were excluded due to first PCR DNA levels below cut-off values. Whether this fall-  
179 out of samples is due to technical issues, e.g. DNA degradation or presence of PCR inhibitors, or due to biological  
180 differences in urinary bacterial loads between individuals, is unknown. The latter may be the case since we  
181 observed that a very high proportion of samples from men (65 %) did not reach above cut-off levels, indicating  
182 that only very little bacterial DNA can be isolated from adult male urine samples. In comparison, none of the



183 samples from women were discarded, 40 % from girls, and 30 % from boys. Our sample size is however too small  
184 to make any solid conclusions on age and gender differences in bacterial loads.

185

186 The strengths of this study are numerous. We have used a very systematic and structured approach with a  
187 relatively large number of participants. Importantly, when evaluating the day-to-day or daily variation, we  
188 included study participants of different gender and age. This was to take into account whether there could be  
189 differences in time-dependent stability of different core microbiotas. Our data showed that, with the exception  
190 of two men, the urinary microbiota was stable regardless of gender and age. Finally, we take into account that  
191 very low levels of bacterial contamination may result in false positive samples, leading to misinterpretation of  
192 true microbiota profiles.

193

## 194 **Conclusion**

195 In conclusion, we showed that the urinary microbiota is stable over time, and that sub-optimal temperatures for  
196 urine storage may be used. We recommend, however, that samples be transferred to -80 °C as quickly as possible  
197 after collection, to avoid loss of the already limited DNA in urine samples. In addition, we highly recommend that  
198 besides including important clinical parameters such as diagnoses and medication, it is important to consider  
199 choice of storage condition and to implement good negative controls and use of background cut-off levels. The  
200 latter is especially important when working with low biomass samples. Finally, we recommend studies  
201 investigating the effects of sexual activity on the microbiota composition in urine, to determine if this may be a  
202 confounding factor. We encourage further studies on the methodological and technical aspects of urinary  
203 microbiota research with the aim of providing strong evidence based guidelines.

204

## 205 **Methods**

## 206 **Study participants and urine collection**

207 In total, 25 healthy volunteers, without symptoms from the bladder (based on self-reporting in a questionnaire  
208 prior to study participation) or intake of any antibiotics within the past 3 months, were included into this study.  
209 Furthermore, in cases where medicine or hormonal contraceptives were used, these should be taken within the  
210 same period on all study days. Use of non-prescription painkillers was not accepted for up to 24 hours prior to  
211 urine collection. In addition, the study participants were instructed to avoid urine collection during menstruation,  
212 and pregnant women were not included into the study. The identity of all donors was anonymous and no  
213 personal data was registered, besides the sex and age interval of which they belonged to. For the initial study on  
214 different storage conditions, 5 women were recruited, and for the following study on daily or day-to-day  
215 variations, 20 participants were recruited encompassing 5 men (18-50 years), 5 women (18-50 years), 5 boys (5-  
216 10 years), and 5 girls (5-10 years). One woman was however excluded from the latter of the two studies, due to  
217 incorrect storage of the collected urine sample, leaving 19 participants in total.

218 For the study on storage conditions, urine was collected at the laboratory by the clean catch method. Samples  
219 were immediately aliquoted in tubes with 10 mL urine and transferred to the specified storage conditions as  
220 summarized in Fig 1, or subjected directly to DNA extraction (RT sample). All conditions were tested in duplicates  
221 (two aliquots from each urine sample). For samples stored at -20 °C, a freezer corresponding to a domestic  
222 freezer was used to mimic a home collection situation. All samples were finally collectively stored at -80 °C, to  
223 rule out bias due to differences in low temperature exposure, until further processing.

224 For the study on daily or day-to-day variations, the participants collected urine at home by the clean catch  
225 method, and urine samples were immediately transferred to -20 °C domestic freezers. All participants delivered  
226 two first morning samples (weekday and weekend) and two evening samples (weekday and weekend) and  
227 likewise, collections on a weekday or weekend day were represented by two independent samples (morning and  
228 evening). This gave rise to two independent samples per time point from each participant. Each independent

229 sample was furthermore divided into two aliquots for duplicate DNA purification. Children were assisted by a  
230 parent to ensure correct sampling. Samples were subsequently, within 24 hours, transported on ice to the  
231 laboratory. Upon arrival to the laboratory, the samples were stored at -80 °C until further processing.

232

### 233 **Ethics statement**

234 Oral consent was obtained from all study participants, or from parents or other legal guardians if participants  
235 were below 18 years of age. The Regional Ethical Committee of Northern Denmark reviewed the study  
236 protocol. Since no personal information were collected from study participants and no intervention was  
237 performed, the Ethical Committee judged that no further approval was required.

238

### 239 **DNA purification**

240 Bacterial DNA was isolated from 10 mL of urine using the QIAamp Viral RNA Mini Kit (Qiagen) according to  
241 manufacturer's recommendations. Prior to DNA extraction, urine samples were centrifuged at 3,000xg for 20  
242 minutes. Pellets were resuspended in PBS, lysis buffer added, and a bead beating step was included using the  
243 TissueLyser LT (Qiagen) for 2 minutes at 30 Hz with a 5 mm stainless steel bead. DNA yield was measured by the  
244 NanoDrop™ Lite Spectrophotometer (Thermo Fisher Scientific) or by fluorometric quantification using the Qubit  
245 4 Fluorometer (Thermo Fisher Scientific) together with the Qubit dsDNA HS Assay Kit (Thermo Fisher Scientific).

246

### 247 **16S rRNA gene sequencing**

248 Bacterial 16S rRNA gene sequencing targeting the V4 region, was performed by DNAsense (Denmark), and  
249 followed a modified version of an Illumina protocol[38], as described by Albertsen et al[39], with an initial  
250 amplicon PCR. Due to upgrades in primer design during the experiment, different versions of reverse primers  
251 targeting the V4 region of the 16S rRNA gene were utilized in the different parts of this study. For the study on

252 storage conditions, the following primer sequences were utilized (Forward: 5'-GTGCCAGCMGCCGCGGTAA-3',  
253 reverse: GGACTACHVGGGTWTCTAAT), while for the study investigating variations between evening and morning  
254 and day-to-day, a slightly modified reverse primer was used (5'-GGACTACNVGGGTWTCTAAT-3'). Samples were  
255 pooled and sequencing was performed on a MiSeq (Illumina, USA), as previously described[38]. To measure error  
256 rate during sequencing and batch effects, a 20 % PhiX control library was added. As negative control, nuclease-  
257 free water was used, while a complex sample obtained from an anaerobic digester system was utilized as a  
258 positive control.

259

## 260 **Bioinformatics and statistics**

261 Quality of sequencing reads was analyzed using FastQC (Babraham Bioinformatics, UK). Forward reads were  
262 quality trimmed using Trimmomatic v 0.32[40] to produce reads with a Phred score of at least 20 and a length of  
263 250 bp. Subsequent bioinformatics followed the UPARSE workflow[41] to remove chimeras, cluster OTUs based  
264 on 97 % identity and assign taxonomy using the RDP classifier as previously described[26].

265 Data analysis was performed in R version 3.5.3[42] through the Rstudio IDE (<http://www.rstudio.com/>) using the  
266 ampvis2 package v.2.4.5[39], as well as Microsoft Office Excel 2013. To evaluate sequencing coverage, a  
267 rarefaction curve was generated using the amp\_rarecurve command, while DNA quantity following the initial  
268 PCR amplification was compared to the corresponding negative control to rule out background contamination.

269 Alpha-diversity was determined using OTU richness and Shannon Diversity Index, as implemented in the  
270 amp\_alphadiv command. Beta-diversity was determined using PCA clustering and heat maps. PCA of variance in  
271 Hellinger transformed OTU abundance between samples and storage conditions were determined using the  
272 amp\_ordinate function, while heat maps displaying the most commonly found OTUs in differing conditions, were  
273 produced using the amp\_heatmap function. For continuous data like DNA concentration, distribution was tested  
274 using Shapiro-Wilks test while variance was tested using Bartlett's test. Normal distributed data was expressed

275 by mean values and analyzed using ANOVA followed by Bonferroni post-hoc test, while data that was not normal  
276 distributed or did not have equal variances, was expressed as median values and analyzed using Kruskal-Wallis  
277 Test followed by Dunn's post hoc test. Differences were considered statistical significant for  $p < 0.05$ .

278

## 279 **References**

- 280 1. Chung H, Pamp SJ, Hill JA, Surana NK, Edelman SM, Troy EB, et al. Gut immune maturation depends on  
281 colonization with a host-specific microbiota. *Cell*. 2012;149: 1578–93. doi:10.1016/j.cell.2012.04.037
- 282 2. Rosser EC, Oleinika K, Tonon S, Doyle R, Bosma A, Carter NA, et al. Regulatory B cells are induced by gut  
283 microbiota-driven interleukin-1 $\beta$  and interleukin-6 production. *Nat Med*. 2014;20: 1334–1339.  
284 doi:10.1038/nm.3680
- 285 3. Velagapudi VR, Hezaveh R, Reigstad CS, Gopalacharyulu P, Yetukuri L, Islam S, et al. The gut microbiota  
286 modulates host energy and lipid metabolism in mice. *J Lipid Res*. 2010;51: 1101–1112.  
287 doi:10.1194/jlr.M002774
- 288 4. Chang JY, Antonopoulos DA, Kalra A, Tonelli A, Khalife WT, Schmidt TM, et al. Decreased Diversity of the  
289 Fecal Microbiome in Recurrent *Clostridium difficile*–Associated Diarrhea. *J Infect Dis*. 2008;197: 435–438.  
290 doi:10.1086/525047
- 291 5. Pedersen HK, Gudmundsdottir V, Nielsen HB, Hyotylainen T, Nielsen T, Jensen BAH, et al. Human gut  
292 microbes impact host serum metabolome and insulin sensitivity. *Nature*. 2016;535: 376–381.  
293 doi:10.1038/nature18646
- 294 6. Turnbaugh PJ, Hamady M, Yatsunenko T, Cantarel BL, Duncan A, Ley RE, et al. A core gut microbiome in  
295 obese and lean twins. *Nature*. 2009;457: 480–4. doi:10.1038/nature07540
- 296 7. Jiang H, Ling Z, Zhang Y, Mao H, Ma Z, Yin Y, et al. Altered fecal microbiota composition in patients with  
297 major depressive disorder. *Brain Behav Immun*. 2015;48: 186–94. doi:10.1016/j.bbi.2015.03.016

- 298 8. Finegold SM, Dowd SE, Gontcharova V, Liu C, Henley KE, Wolcott RD, et al. Pyrosequencing study of fecal  
299 microflora of autistic and control children. *Anaerobe*. 2010;16: 444–53.  
300 doi:10.1016/j.anaerobe.2010.06.008
- 301 9. Aarts E, Ederveen THA, Naaijen J, Zwiers MP, Boekhorst J, Timmerman HM, et al. Gut microbiome in ADHD  
302 and its relation to neural reward anticipation. *PLoS One*. 2017;12: e0183509.  
303 doi:10.1371/journal.pone.0183509
- 304 10. Pearce MM, Zilliox MJ, Rosenfeld AB, Thomas-White KJ, Richter HE, Nager CW, et al. The female urinary  
305 microbiome in urgency urinary incontinence. *Am J Obstet Gynecol*. 2015;213: 347e1-347e11.  
306 doi:10.1016/j.ajog.2015.07.009
- 307 11. Thomas-White KJ, Hilt EE, Fok C, Pearce MM, Mueller ER, Kliethermes S, et al. Incontinence medication  
308 response relates to the female urinary microbiota. *Int Urogynecol J*. 2016;27: 723–733.  
309 doi:10.1007/s00192-015-2847-x
- 310 12. Hilt EE, McKinley K, Pearce MM, Rosenfeld AB, Zilliox MJ, Mueller ER, et al. Urine is not sterile: Use of  
311 enhanced urine culture techniques to detect resident bacterial flora in the adult female bladder. *J Clin  
312 Microbiol*. 2014;52: 871–876. doi:10.1128/JCM.02876-13
- 313 13. Lewis DA, Brown R, Williams J, White P, Jacobson SK, Marchesi JR, et al. The human urinary microbiome;  
314 bacterial DNA in voided urine of asymptomatic adults. *Front Cell Infect Microbiol*. 2013;3: 41.  
315 doi:10.3389/fcimb.2013.00041
- 316 14. Kassiri B, Shrestha E, Kasprenski M, Antonescu C, Florea LD, Sfanos KS, et al. A Prospective Study of the  
317 Urinary and Gastrointestinal Microbiome in Prepubertal Males. *Urology*. 2019;131: 204–210.  
318 doi:10.1016/j.urology.2019.05.031
- 319 15. Abernethy MG, Rosenfeld A, White JR, Mueller MG, Lewicky-Gaup C, Kenton K. Urinary microbiome and  
320 cytokine levels in women with interstitial cystitis. *Obstet Gynecol*. 2017;129: 500–506.

- 321           doi:10.1097/AOG.0000000000001892
- 322   16.   Pearce MM, Hilt EE, Rosenfeld AB, Zilliox MJ, Thomas-White K, Fok C, et al. The female urinary  
323           microbiome: a comparison of women with and without urgency urinary incontinence. *MBio*. 2014;5:  
324           e01283-14. doi:10.1128/mBio.01283-14
- 325   17.   Siddiqui H, Nederbragt AJ, Lagesen K, Jeansson SL, Jakobsen KS. Assessing diversity of the female urine  
326           microbiota by high throughput sequencing of 16S rDNA amplicons. *BMC Microbiol*. 2011;11: 244.  
327           doi:10.1186/1471-2180-11-244
- 328   18.   Fouts DE, Pieper R, Szpakowski S, Pohl H, Knoblach S, Suh MJ, et al. Integrated next-generation sequencing  
329           of 16S rDNA and metaproteomics differentiate the healthy urine microbiome from asymptomatic  
330           bacteriuria in neuropathic bladder associated with spinal cord injury. *J Transl Med*. 2012;10.  
331           doi:10.1186/1479-5876-10-174
- 332   19.   Dong Q, Nelson DE, Toh E, Diao L, Gao X, Fortenberry JD, et al. The microbial communities in male first  
333           catch urine are highly similar to those in paired urethral swab specimens. *PLoS One*. 2011;6.  
334           doi:10.1371/journal.pone.0019709
- 335   20.   Nelson DE, Dong Q, van der Pol B, Toh E, Fan B, Katz BP, et al. Bacterial communities of the coronal sulcus  
336           and distal urethra of adolescent males. *PLoS One*. 2012;7. doi:10.1371/journal.pone.0036298
- 337   21.   Nelson DE, van der Pol B, Dong Q, Revanna K V., Fan B, Easwaran S, et al. Characteristic male urine  
338           microbiomes associate with asymptomatic sexually transmitted infection. *PLoS One*. 2010;5.  
339           doi:10.1371/journal.pone.0014116
- 340   22.   Gottschick C, Deng ZL, Vital M, Masur C, Abels C, Pieper DH, et al. The urinary microbiota of men and  
341           women and its changes in women during bacterial vaginosis and antibiotic treatment. *Microbiome*.  
342           2017;5: 99. doi:10.1186/s40168-017-0305-3
- 343   23.   Shrestha E, White JR, Yu SH, Kulac I, Ertunc O, De Marzo AM, et al. Profiling the Urinary Microbiome in

- 344 Men with Positive versus Negative Biopsies for Prostate Cancer. *J Urol.* 2018;199: 161–171.  
345 doi:10.1016/j.juro.2017.08.001
- 346 24. Karstens L, Asquith M, Davin S, Stauffer P, Fair D, Gregory WT, et al. Does the Urinary Microbiome Play a  
347 Role in Urgency Urinary Incontinence and Its Severity? *Front Cell Infect Microbiol.* 2016;6.  
348 doi:10.3389/fcimb.2016.00078
- 349 25. Siddiqui H, Lagesen K, Nederbragt AJ, Jeansson SL, Jakobsen KS. Alterations of microbiota in urine from  
350 women with interstitial cystitis. *BMC Microbiol.* 2012;12. doi:10.1186/1471-2180-12-205
- 351 26. Bundgaard-Nielsen C, Hagstrøm S, Sørensen S. Interpersonal Variations in Gut Microbiota Profiles  
352 Supersedes the Effects of Differing Fecal Storage Conditions. *Sci Rep.* 2018; 1–9. doi:10.1038/s41598-018-  
353 35843-0
- 354 27. Wu GD, Lewis JD, Hoffmann C, Chen Y-Y, Knight R, Bittinger K, et al. Sampling and pyrosequencing  
355 methods for characterizing bacterial communities in the human gut using 16S sequence tags. *BMC*  
356 *Microbiol.* 2010;10: 206. doi:10.1186/1471-2180-10-206
- 357 28. Mackenzie BW, Waite DW, Taylor MW. Evaluating variation in human gut microbiota profiles due to DNA  
358 extraction method and inter-subject differences. *Front Microbiol.* 2015;6: 1–11.  
359 doi:10.3389/fmicb.2015.00130
- 360 29. Kia E, MacKenzie BW, Middleton D, Lau A, Waite DW, Lewis G, et al. Integrity of the human faecal  
361 microbiota following long-term sample storage. *PLoS One.* 2016;11: 1–8.  
362 doi:10.1371/journal.pone.0163666
- 363 30. Costea PI, Zeller G, Sunagawa S, Pelletier E, Alberti A, Levenez F, et al. Towards standards for human fecal  
364 sample processing in metagenomic studies. *Nat Biotechnol.* 2017;35: 1069–1076. doi:10.1038/nbt.3960
- 365 31. Panek M, Čipčić Paljetak H, Barešić A, Perić M, Matijašić M, Lojkić I, et al. Methodology challenges in  
366 studying human gut microbiota-Effects of collection, storage, DNA extraction and next generation



- 367 sequencing technologies. *Sci Rep.* 2018;8: 1–13. doi:10.1038/s41598-018-23296-4
- 368 32. El Bali L, Diman A, Bernard A, Roosens NHC, Dekeersmaecker SCJ. Comparative study of seven commercial  
369 kits for human dna extraction from urine samples suitable for dna biomarker-based public health studies.  
370 *J Biomol Tech.* 2014;25: 96–110. doi:10.7171/jbt.14-2504-002
- 371 33. Wolfe AJ, Toh E, Shibata N, Rong R, Kenton K, FitzGerald MP, et al. Evidence of uncultivated bacteria in  
372 the adult female bladder. *J Clin Microbiol.* 2012;50: 1376–1383. doi:10.1128/JCM.05852-11
- 373 34. Jung CE, Chopyk J, Shin JH, Lukacz ES, Brubaker L, Schwanemann LK, et al. Benchmarking urine storage  
374 and collection conditions for evaluating the female urinary microbiome. *Sci Rep.* 2019;9: 13409.  
375 doi:10.1038/s41598-019-49823-5
- 376 35. David LA, Materna AC, Friedman J, Campos-Baptista MI, Blackburn MC, Perrotta A, et al. Host lifestyle  
377 affects human microbiota on daily timescales. *Genome Biol.* 2014;15: R89. doi:10.1186/gb-2014-15-7-r89
- 378 36. Ott SJ, Musfeldt M, Timmis KN, Hampe J, Wenderoth DF, Schreiber S. In vitro alterations of intestinal  
379 bacterial microbiota in fecal samples during storage. *Diagn Microbiol Infect Dis.* 2004;50: 237–245.  
380 doi:10.1016/j.diagmicrobio.2004.08.012
- 381 37. McDonald D, Hyde ER, Debelius JW, Morton JT, Gonzalez A, Ackermann G, et al. American Gut: an Open  
382 Platform for Citizen-Science Microbiome Research. *bioRxiv.* 2018;3: 277970. doi:10.1101/277970
- 383 38. Caporaso JG, Lauber CL, Walters WA, Berg-Lyons D, Huntley J, Fierer N, et al. Ultra-high-throughput  
384 microbial community analysis on the Illumina HiSeq and MiSeq platforms. *ISME J.* 2012;6: 1621–1624.  
385 doi:10.1038/ismej.2012.8
- 386 39. Albertsen M, Karst SM, Ziegler AS, Kirkegaard RH, Nielsen PH. Back to basics - The influence of DNA  
387 extraction and primer choice on phylogenetic analysis of activated sludge communities. *PLoS One.*  
388 2015;10: 1–15. doi:10.1371/journal.pone.0132783
- 389 40. Bolger AM, Lohse M, Usadel B. Trimmomatic: a flexible trimmer for Illumina sequence data.

390 Bioinformatics. 2014;30: 2114–20. doi:10.1093/bioinformatics/btu170

391 41. Edgar RC. UPARSE: highly accurate OTU sequences from microbial amplicon reads. Nat Methods. 2013;10:  
392 996–8. doi:10.1038/nmeth.2604

393 42. R Development Core Team. R: A Language and Environment for Statistical Computing. In: the R Foundation  
394 for Statistical Computing [Internet]. [cited 3 Apr 2019]. Available: <https://www.r-project.org/>

395

## 396 **Figure legends**

397 **Fig 1: Urine storage conditions.** Urine samples were either processed directly (room temperature, 0 hours) or at  
398 different temperatures for different time periods. Duplicate experiments were performed.

399

400 **Fig 2: DNA yield.** Quantity of total DNA purified from urine shown for each donor (A-E) and storage condition.  
401 Each sample is named as “temperature”\_“duration”. \*P<0.05. RT = room temperature, >72 = sample are stored  
402 for at least 72 hours.

403

404 **Fig 3: Quality control used for removing low quality samples.** A. Rarefaction Curve, showing number of unique  
405 OTUs generated based on quantity of reads. The red dotted line indicates cutoff value of 10.000 reads. Three  
406 samples were excluded due to values below cutoff. B. Principal Component Analysis (PCA) clustering of samples  
407 using Hellinger transformed OTU abundances, in order to identify possible outliers. C. Heatmap depicting the 20  
408 most common OTUs for each separate duplicate. Each name consists of phylum followed by genus name. If no  
409 genus could be identified, the best taxonomic assignment is listed. The heatmap was used to exclude potential  
410 outliers. The following four samples were excluded: A -20 72h\_2, D -20 72h\_2, D 4 24h\_1 and E -80 >72h\_2.  
411 These has been circled in B. and marked with a red \* in C.

412

413 **Fig 4: Effects of storage temperature and duration on urinary microbiota alpha diversity.** A. OTU richness  
414 showing numbers of unique OTUs observed in different storage conditions and durations. B. Shannon Diversity  
415 Index visualizing differences and similarities in diversity of OTU composition within samples.

416

417 **Fig 5: Effects of storage temperature and duration on urinary microbiota beta-diversity.** A. Clustering of  
418 samples based on PCA of Hellinger transformed OTU abundances. B. Heat map depicting the 20 most common  
419 OTUs in different storage conditions. Each name consist of phylum followed by genus name. If no genus could  
420 be identified, the best taxonomic assignment is listed.

421

422 **Fig 6: Effects of sampling at evening compared to the following morning on alpha diversity.** A. OTU richness  
423 depicting number of unique OTUs observed at evening compared to morning. B. Shannon diversity index  
424 visualizing similarities in diversity between evening and morning samples. Two donors, one girl (donor 8) and  
425 one man (donor 13), were excluded from this part of the analysis, since matching morning-evening sample pairs  
426 were not available due to quality control.

427

428 **Fig 7: Beta diversity between samples collected in the evening compared to the following morning.** A.  
429 Relatedness in bacterial composition of samples, as visualized using PCA of Hellinger transformed OTU  
430 abundances. Colors indicate donor while shapes indicate time. B. Heat maps listing the 20 most common OTUs  
431 for each donor at morning and evening. Each name consists of phylum followed by genus name. If no genus could  
432 be identified, the best taxonomic assignment is given. As for figure 7, two donors, one girl (donor 8) and one man  
433 (donor 13), were excluded from this part of the analysis, since they did not contain matching morning-evening  
434 samples.

435

436 **Fig 8: Alpha diversity of urinary microbiota on weekdays compared to weekends.** A. OTU richness depicting  
437 number of unique OTUs in samples collected during weekdays compared to weekends. B. Shannon diversity  
438 index visualizing similarities in diversity of samples collected during weekdays compared to weekends. Three  
439 donors, one girl (donor 8) and two men (donors 13 and 15) were removed from this part of the analysis, since  
440 they did not contain matching weekday-weekend samples.

441

442 **Fig 9: Beta diversity of urinary microbiota at weekdays compared to weekends.** A. Variation in bacterial  
443 composition of samples collected during weekdays compared to weekends, using PCA of Hellinger transformed  
444 OTU abundances. Colors indicate donor while shape indicate day. B. Heat maps listing the 20 most common OTUs  
445 for each donor at weekdays compared to weekends. As for figure 9, three donors, one girl (donor 8) and two  
446 men (donors 13 and 15) were removed from this part of the analysis, since they did not contain matching  
447 weekday-weekend samples.

448

## 449 **Supplementary information**

450 **S1\_Metadata CP154. 16S rRNA gene sequencing metadata.** Information describing the samples used for  
451 investigating storage.

452 **S2\_otus CP154. 16S rRNA gene sequences.** FASTA file containing the DNA sequences generated using 16S rRNA  
453 gene sequencing of the samples used for investigating storage.

454 **S3\_otutable CP154. 16S rRNA gene sequencing OTUtable.** OTU table documenting numbers of different OTUs  
455 generated during the 16S rRNA gene sequencing of the samples used for investigating storage.

456 **S4\_metadata CP303. 16S rRNA gene sequencing metadata.** Information describing the samples used for  
457 investigating bacterial variation across different time of day or between weekday or weekend.

458 **S5\_otus CP303. 16S rRNA gene sequences.** FASTA file containing the DNA sequences generated using 16S rRNA

459 gene sequencing of the samples used for investigating bacterial variation across different time of day or between  
460 weekday or weekend.

461 **S6\_otutable CP303. 16S rRNA gene sequencing OTUtable.** OTU table documenting numbers of different OTUs  
462 generated during the 16S rRNA gene sequencing of the samples used for investigating bacterial variation across  
463 different time of day or between weekday or weekend.

**A**

Number of Observed OTUs

bioRxiv preprint doi: <https://doi.org/10.1101/2019.12.13.875187>; this version posted December 13, 2019. The copyright holder for this preprint (which was not certified by peer review) is the author/funder, who has granted bioRxiv a license to display the preprint in perpetuity. It is made available under aCC-BY 4.0 International license.

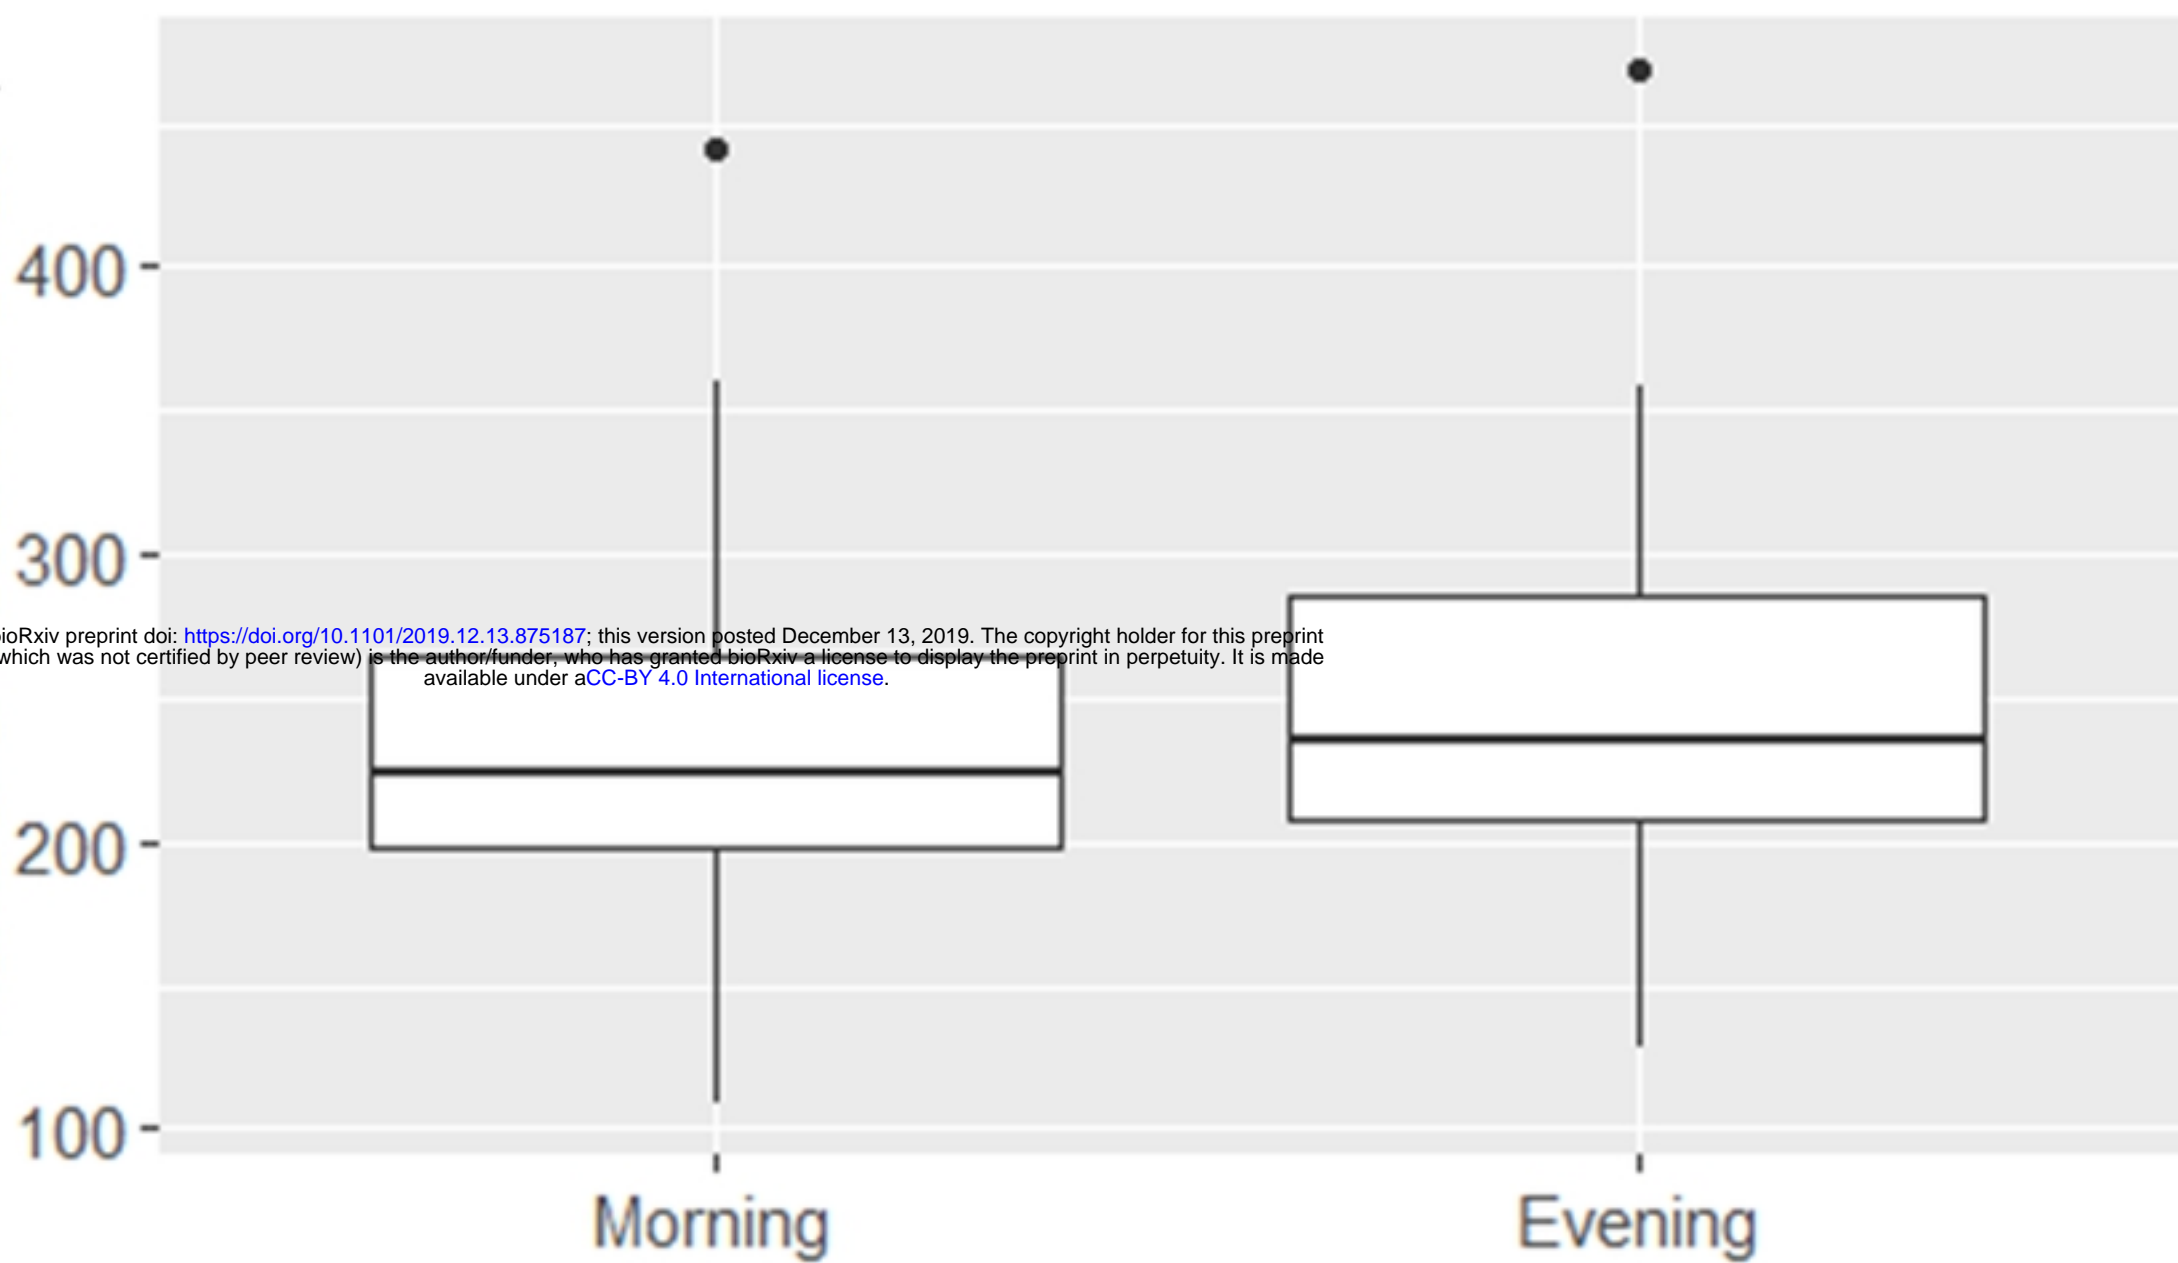**B**

Shannon index

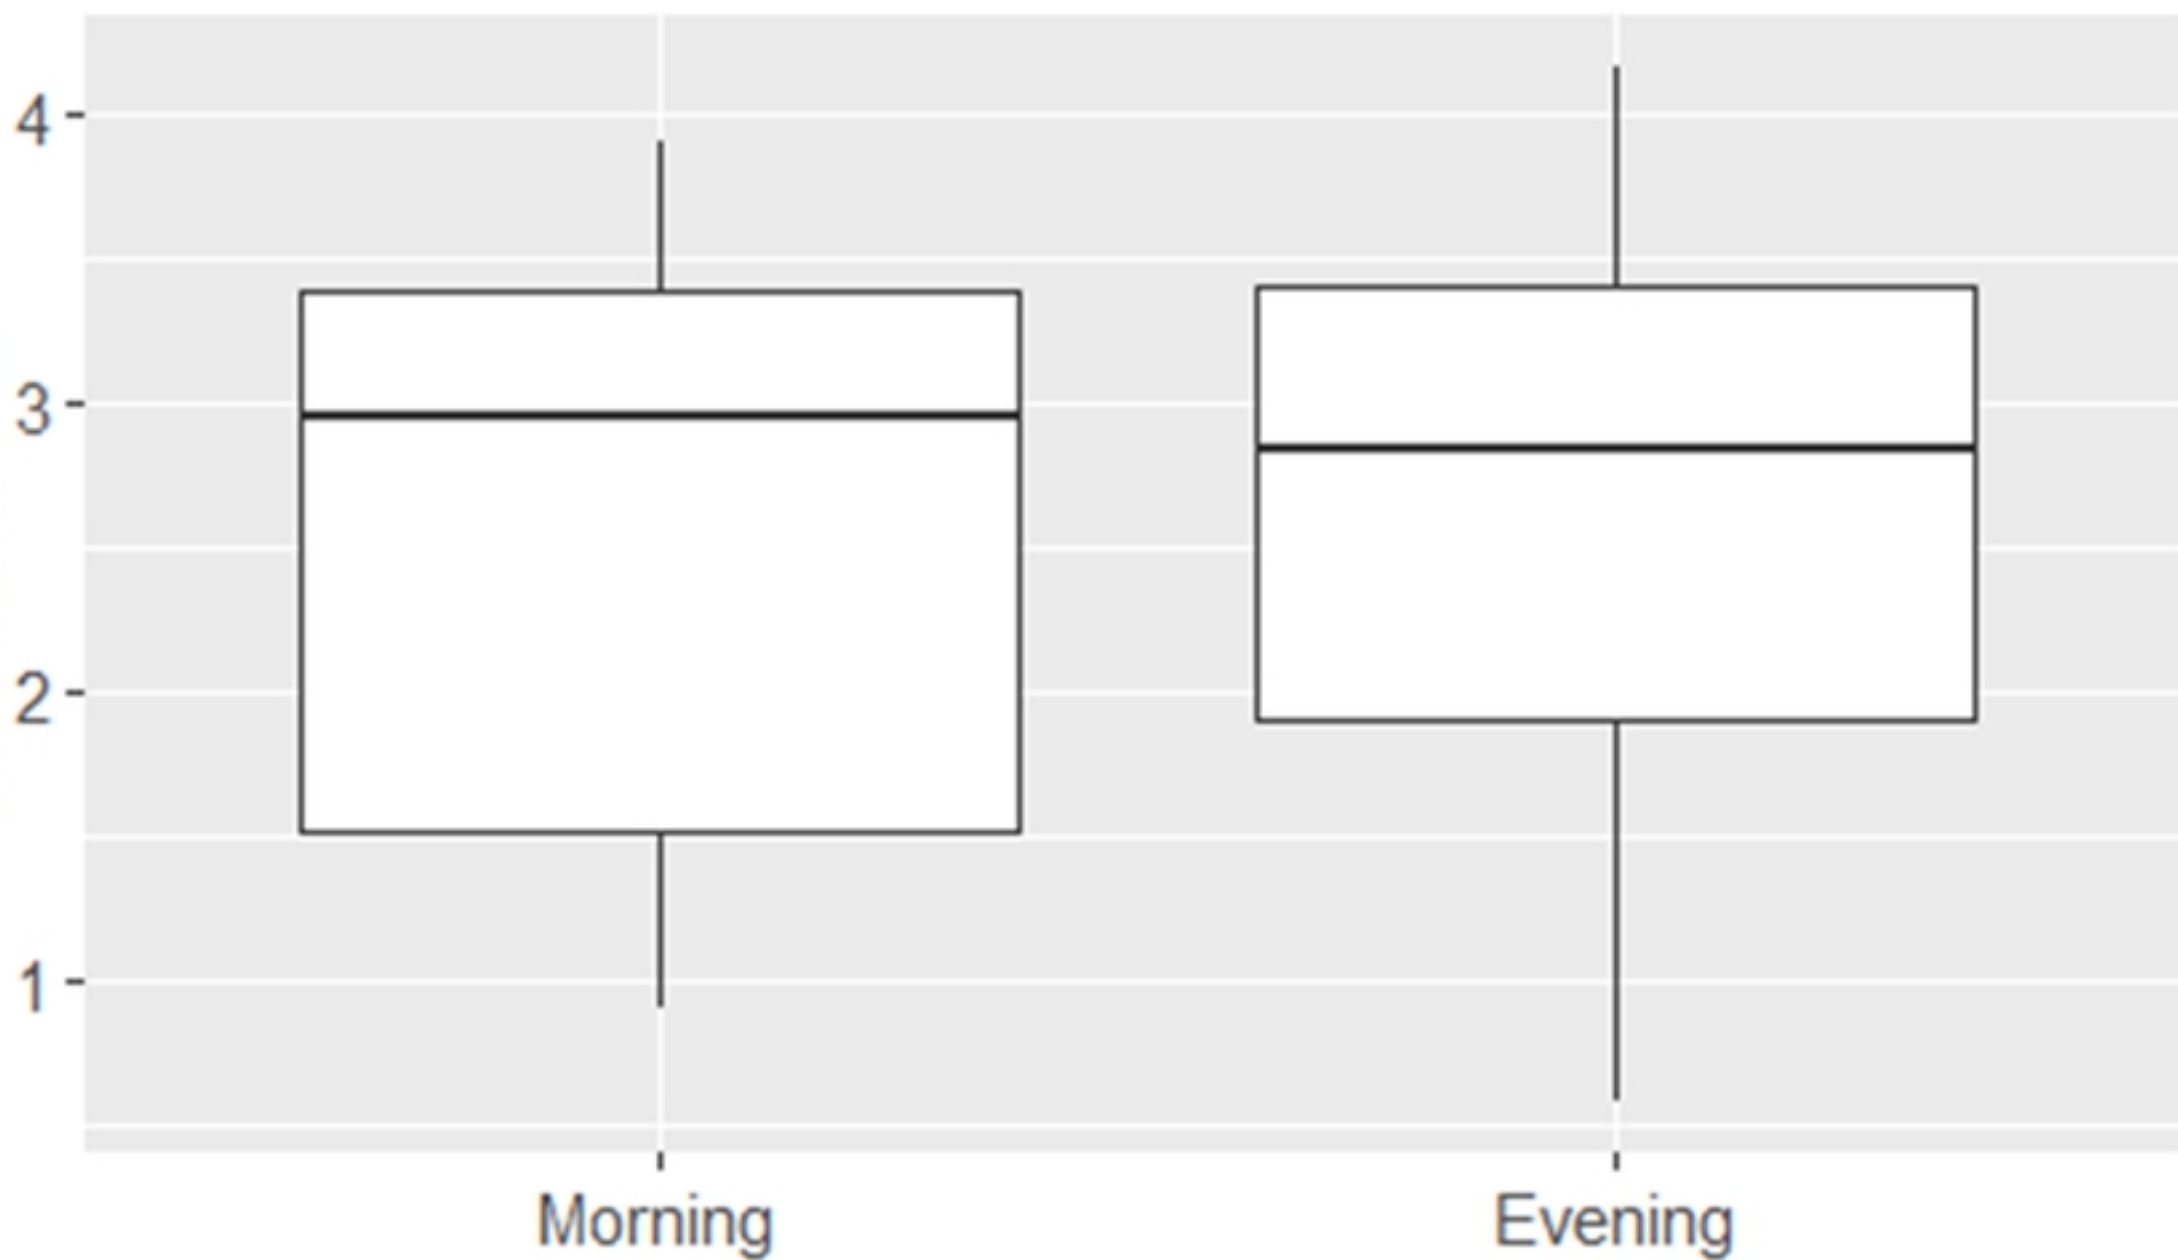



**A**

Number of Observed OTUs

bioRxiv preprint doi: <https://doi.org/10.1101/2019.12.13.875187>; this version posted December 13, 2019. The copyright holder for this preprint (which was not certified by peer review) is the author/funder, who has granted bioRxiv a license to display the preprint in perpetuity. It is made available under aCC-BY 4.0 International license.

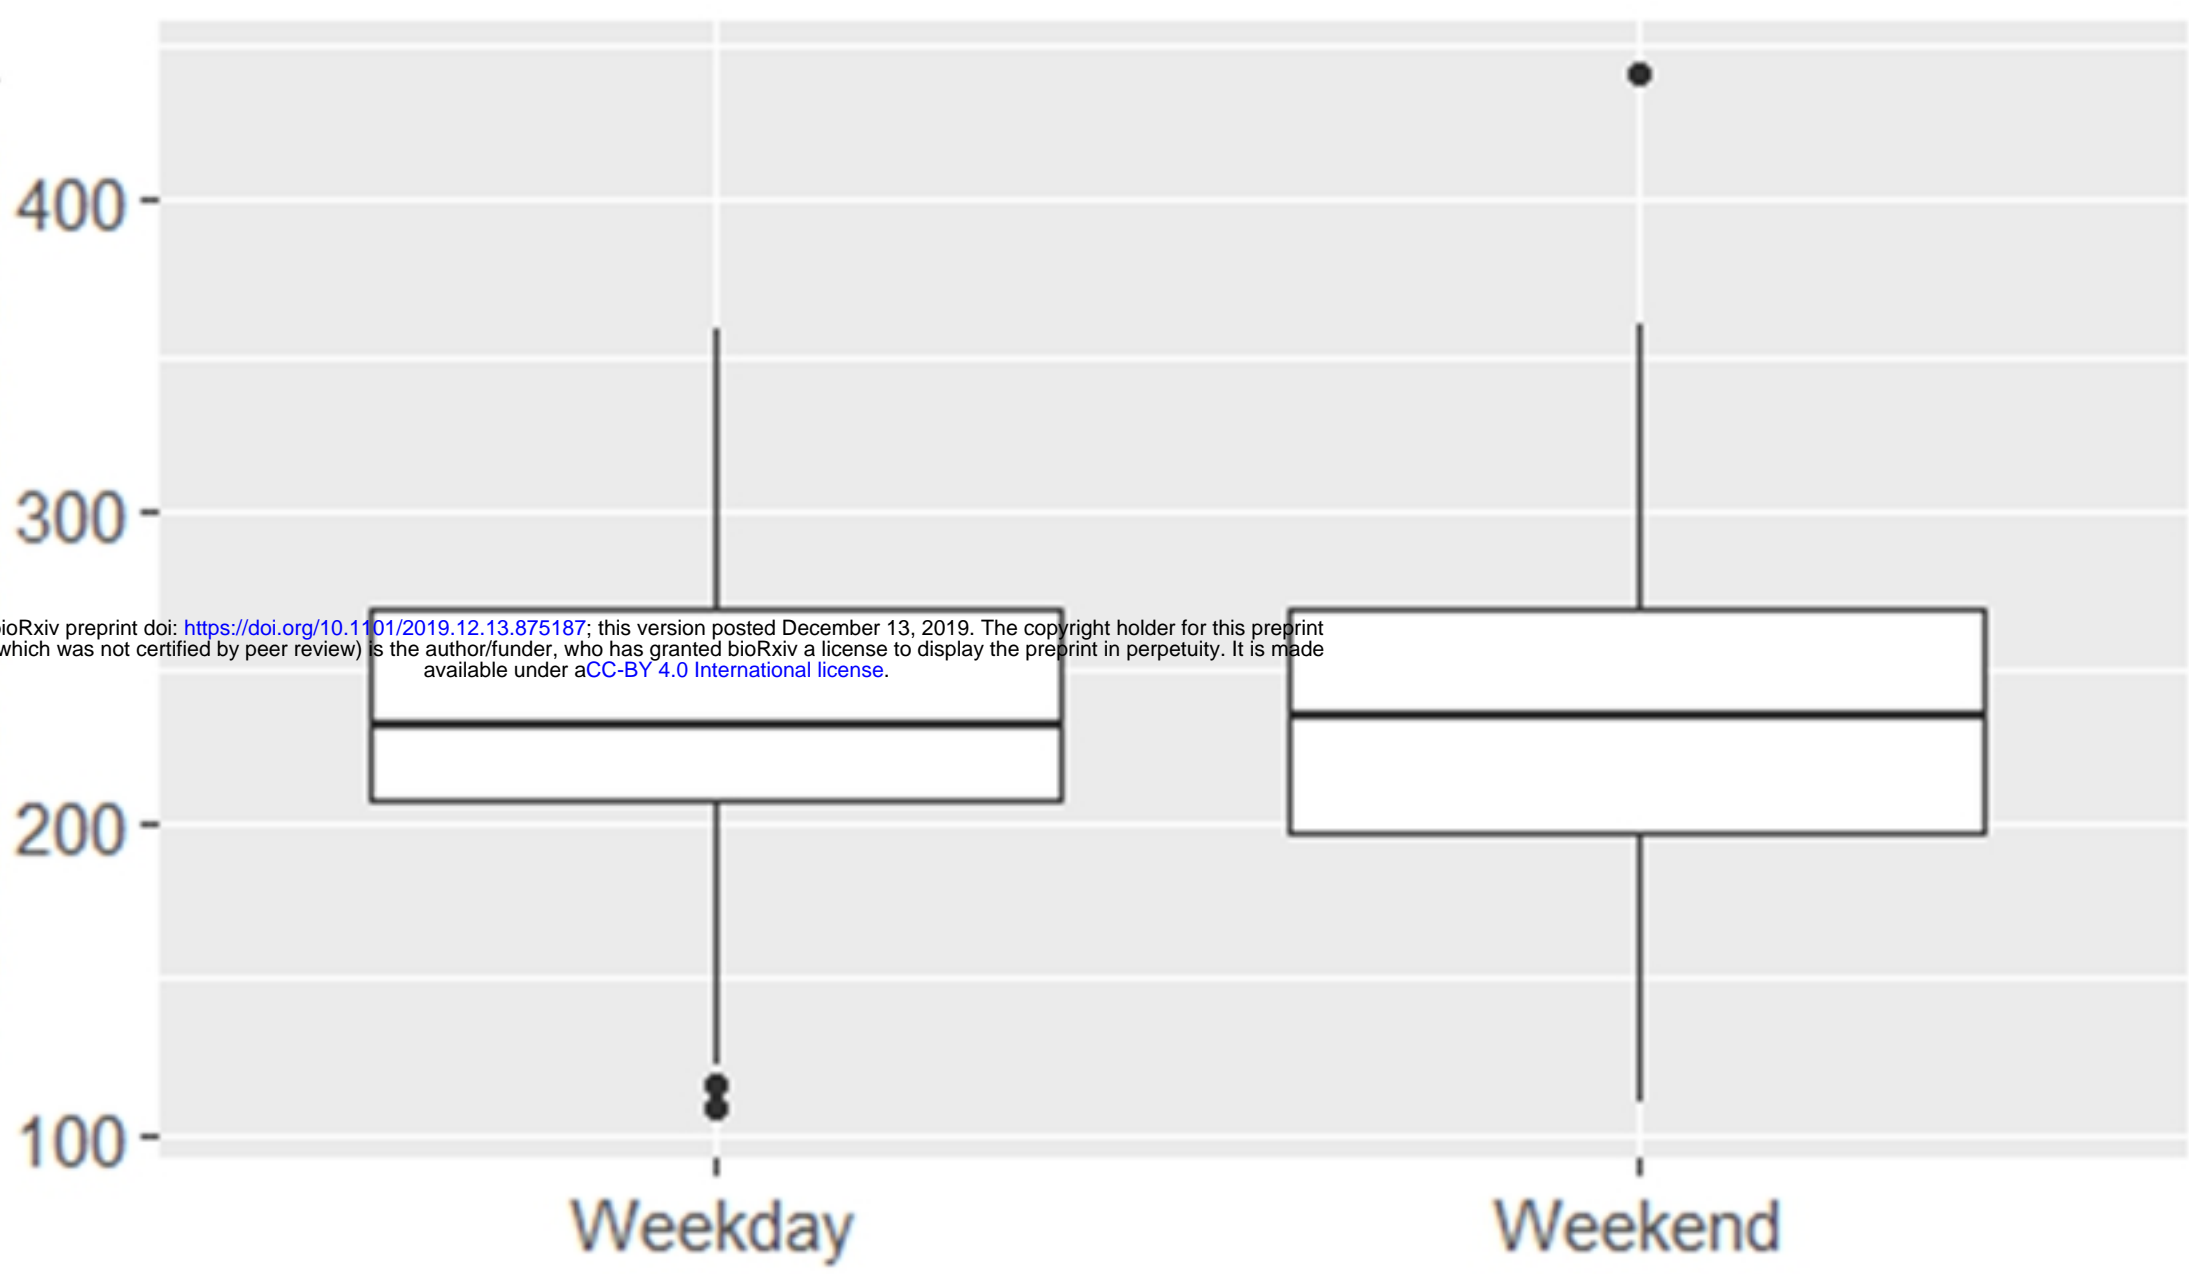**B**

Shannon index

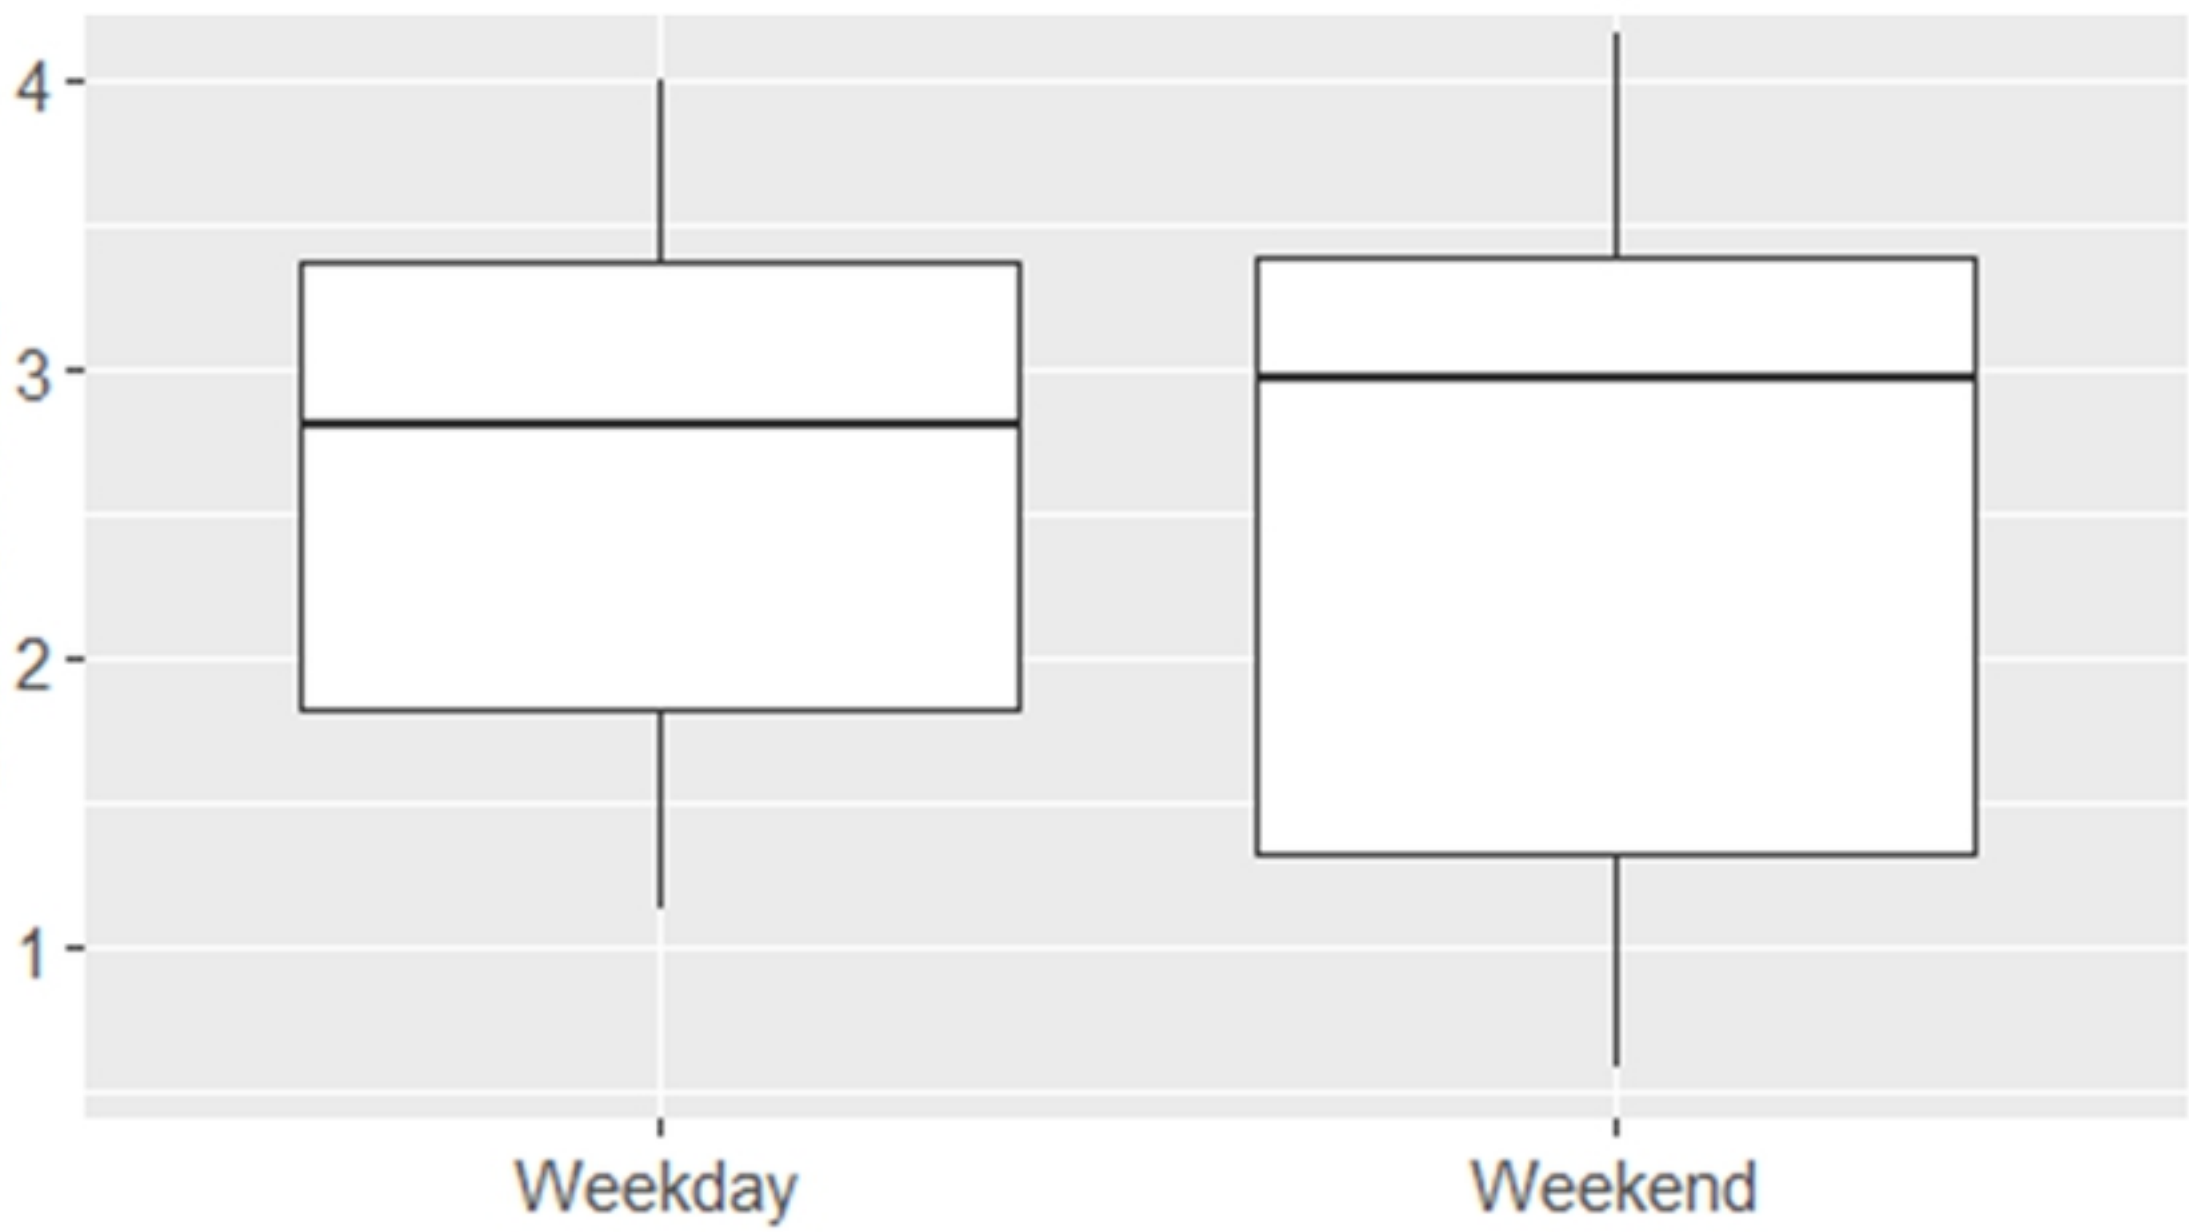



**A**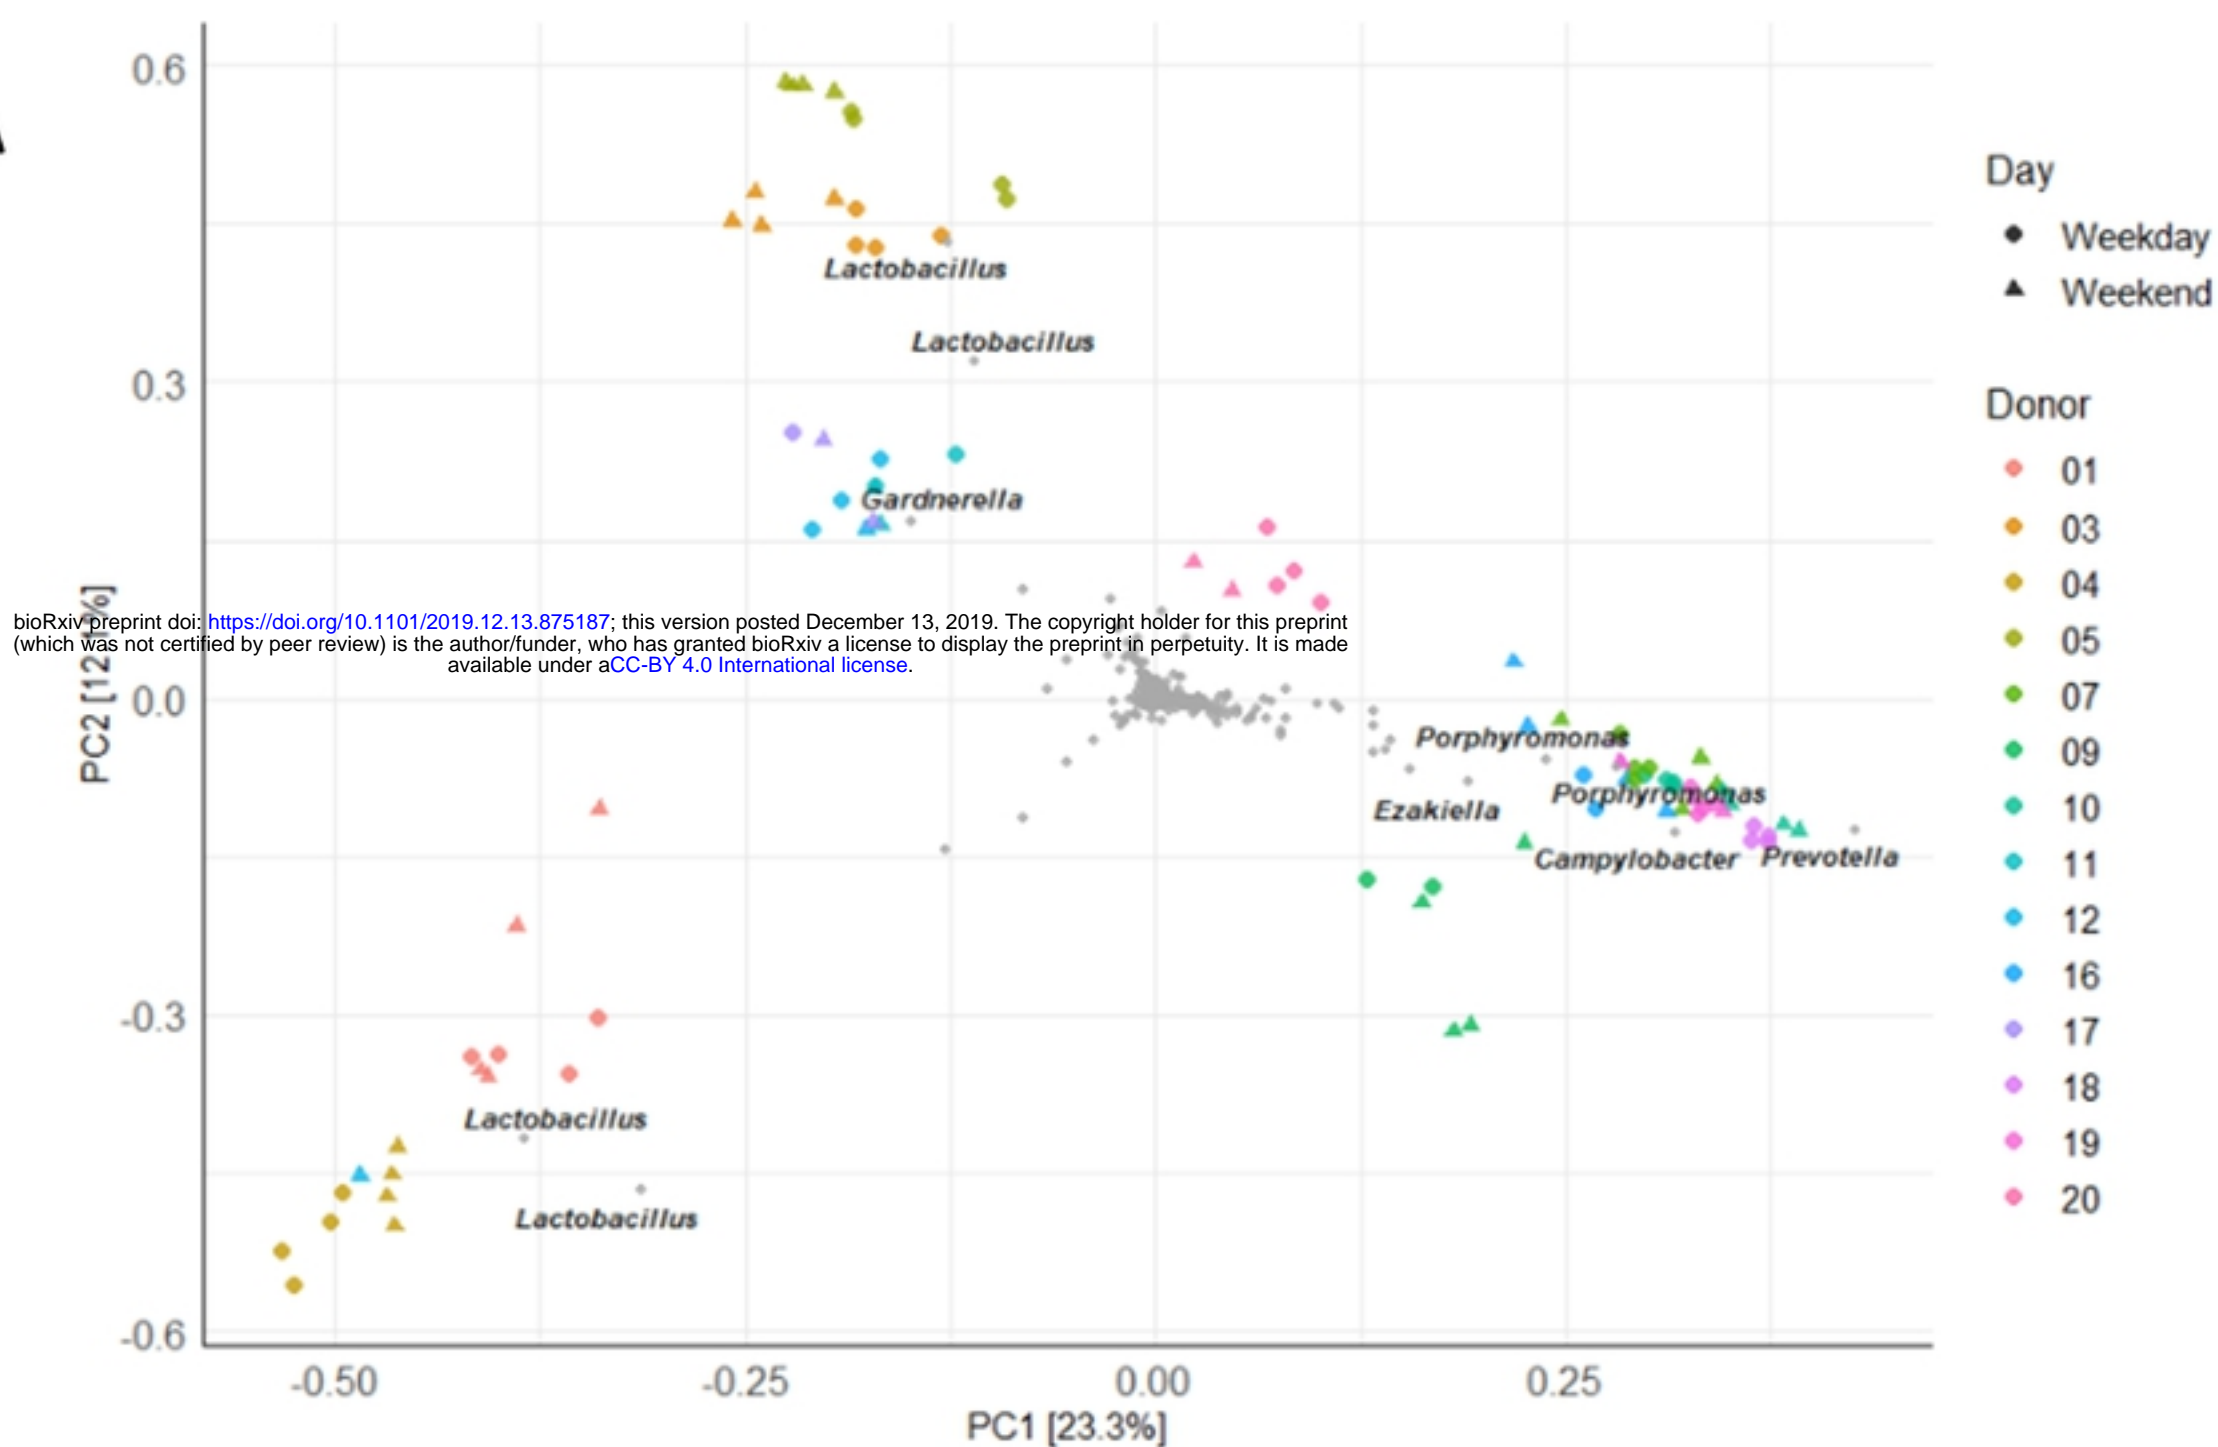**B**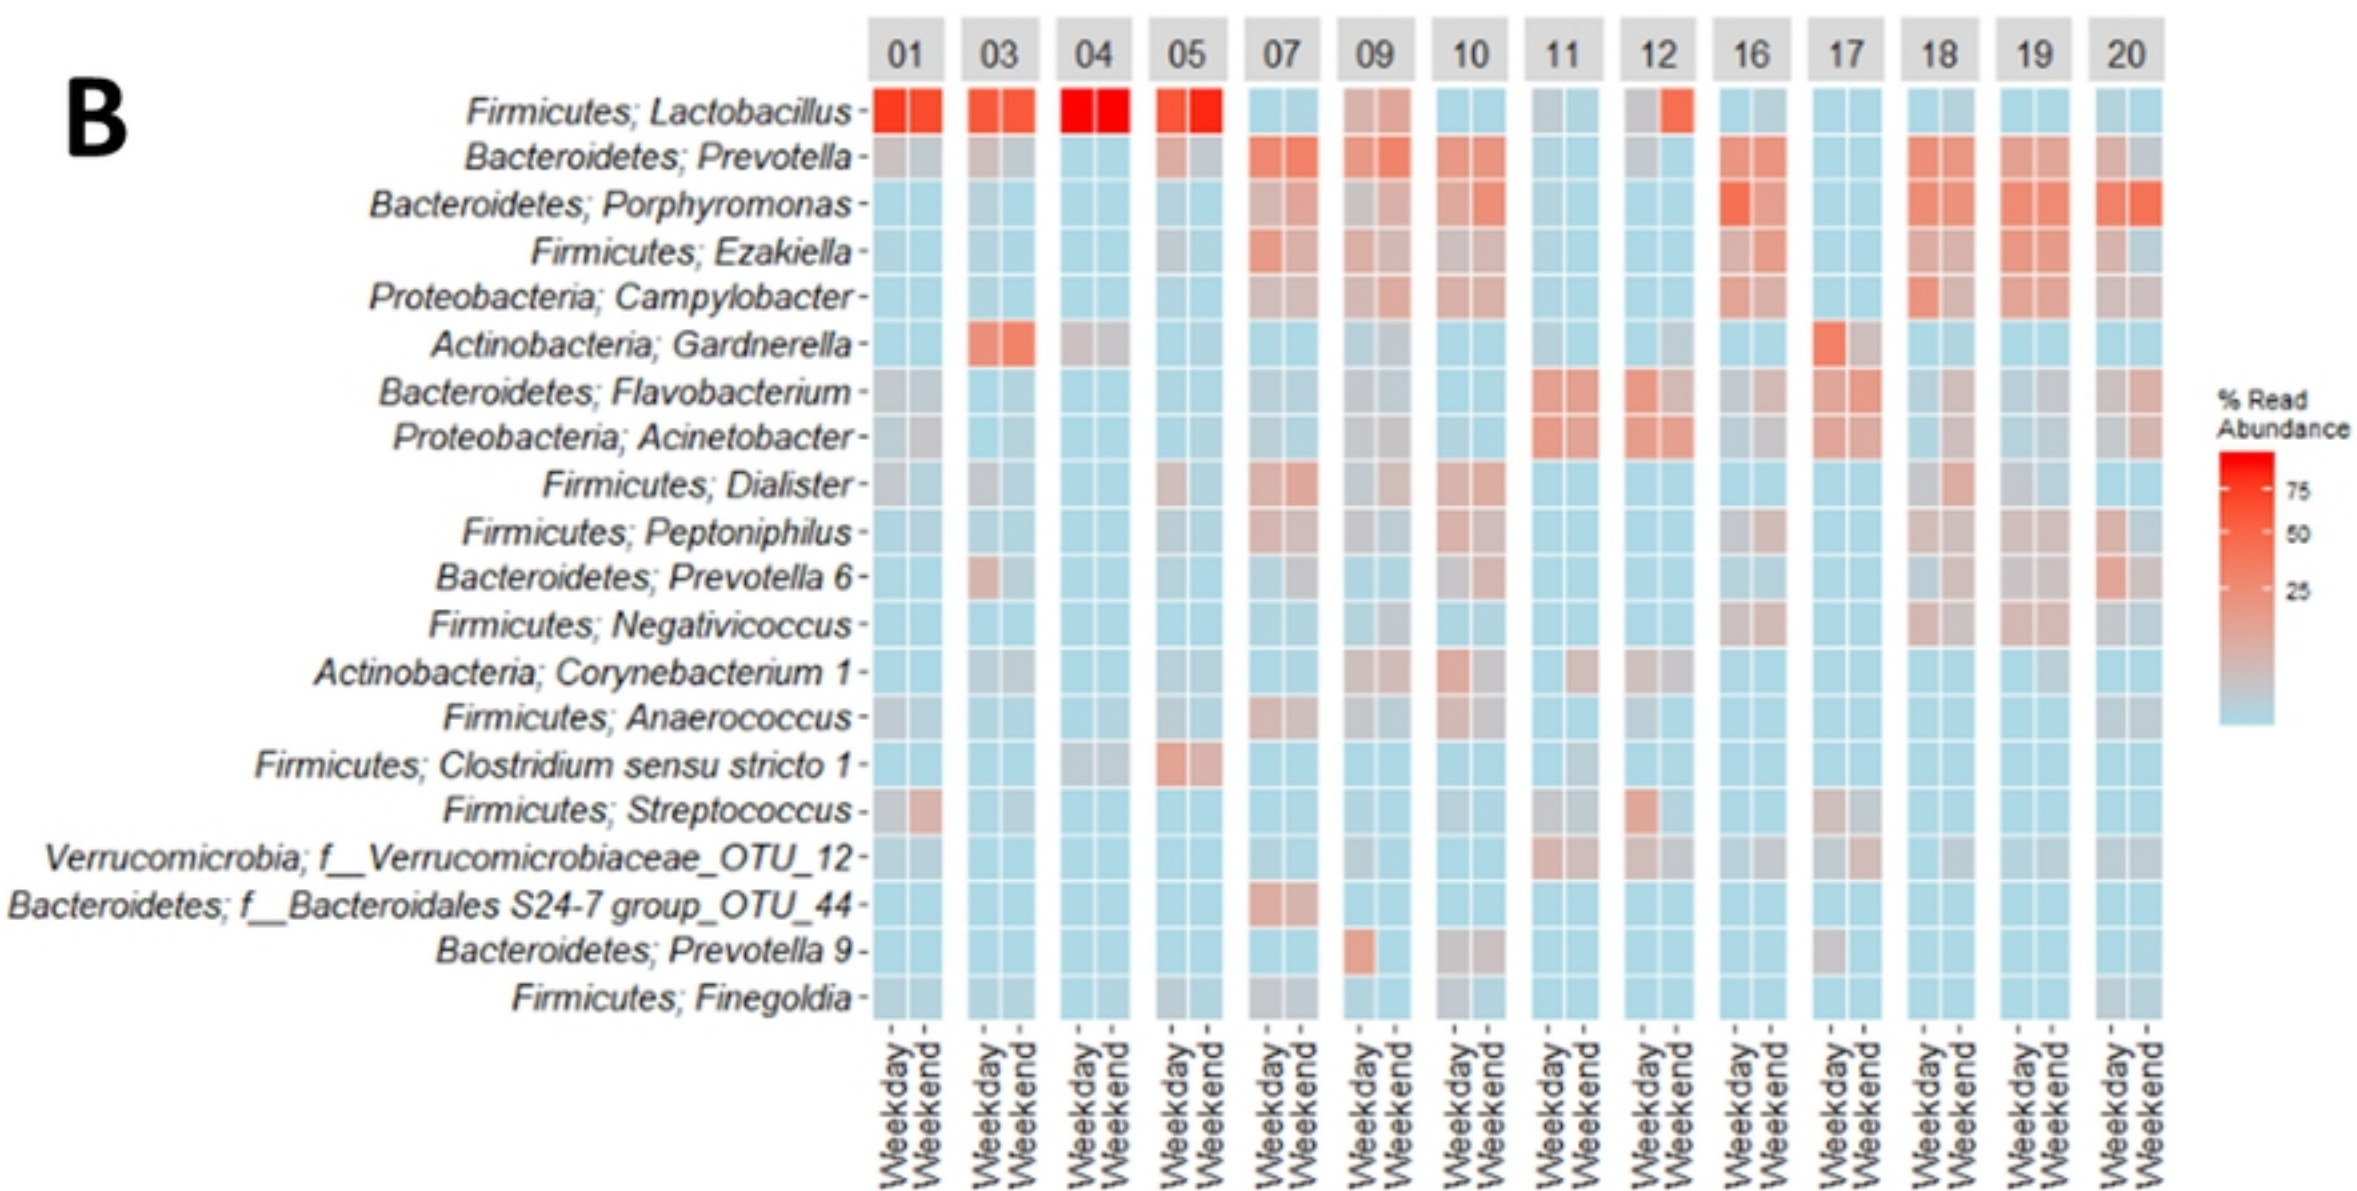

**Storage Conditions**  
**Donor A, B, C, D, E**

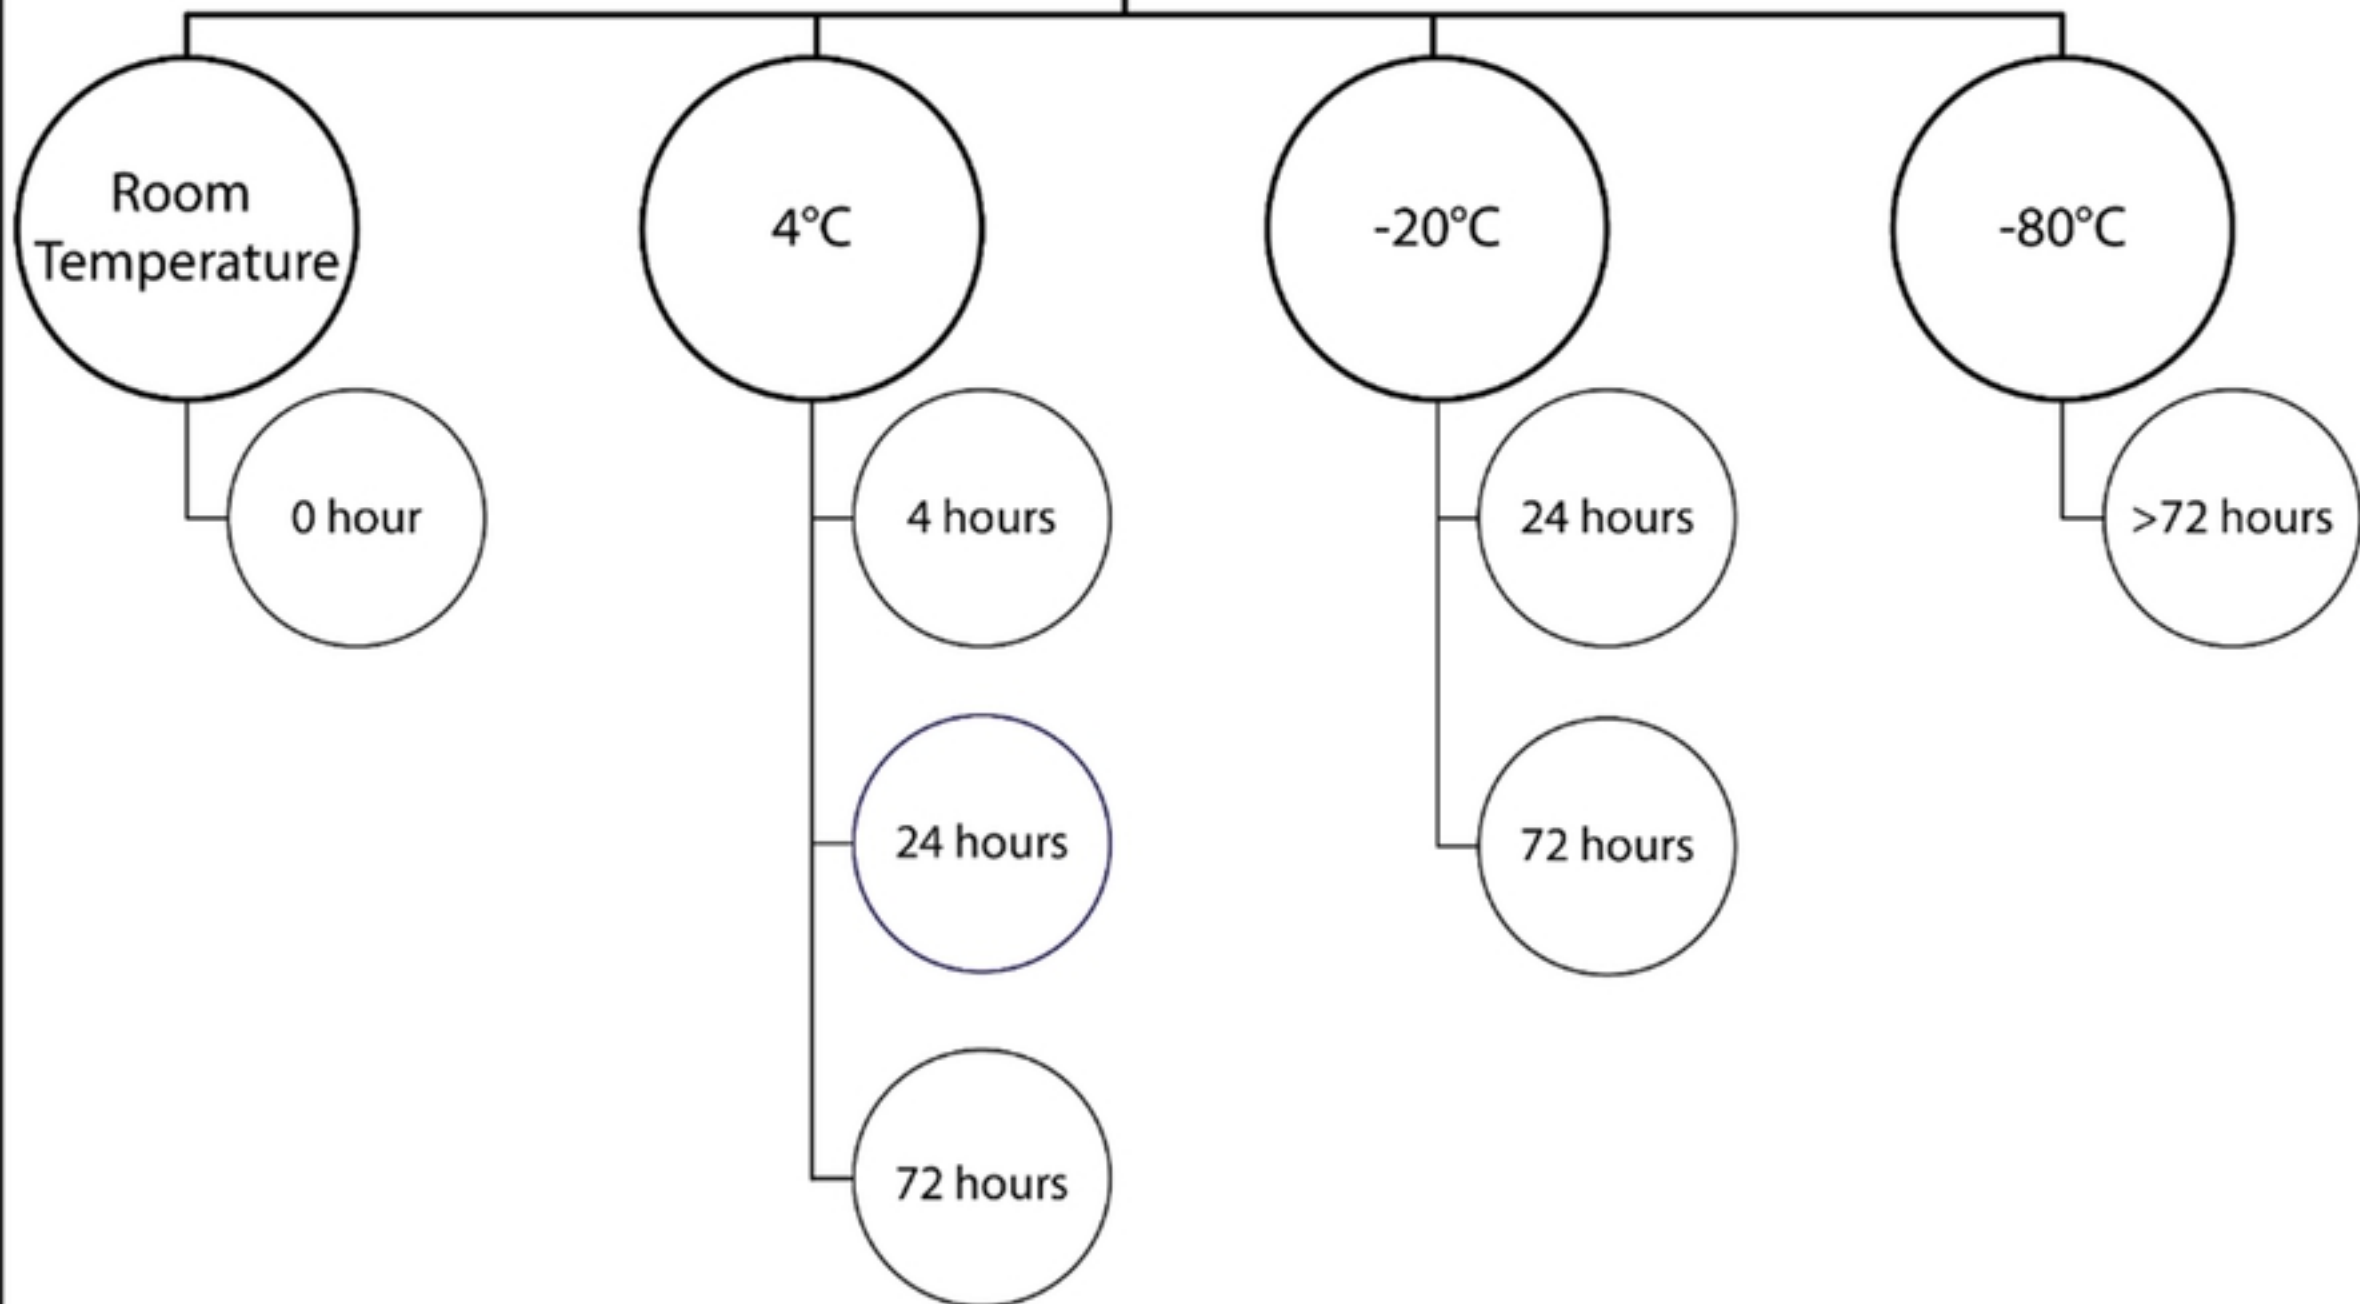

# Total DNA

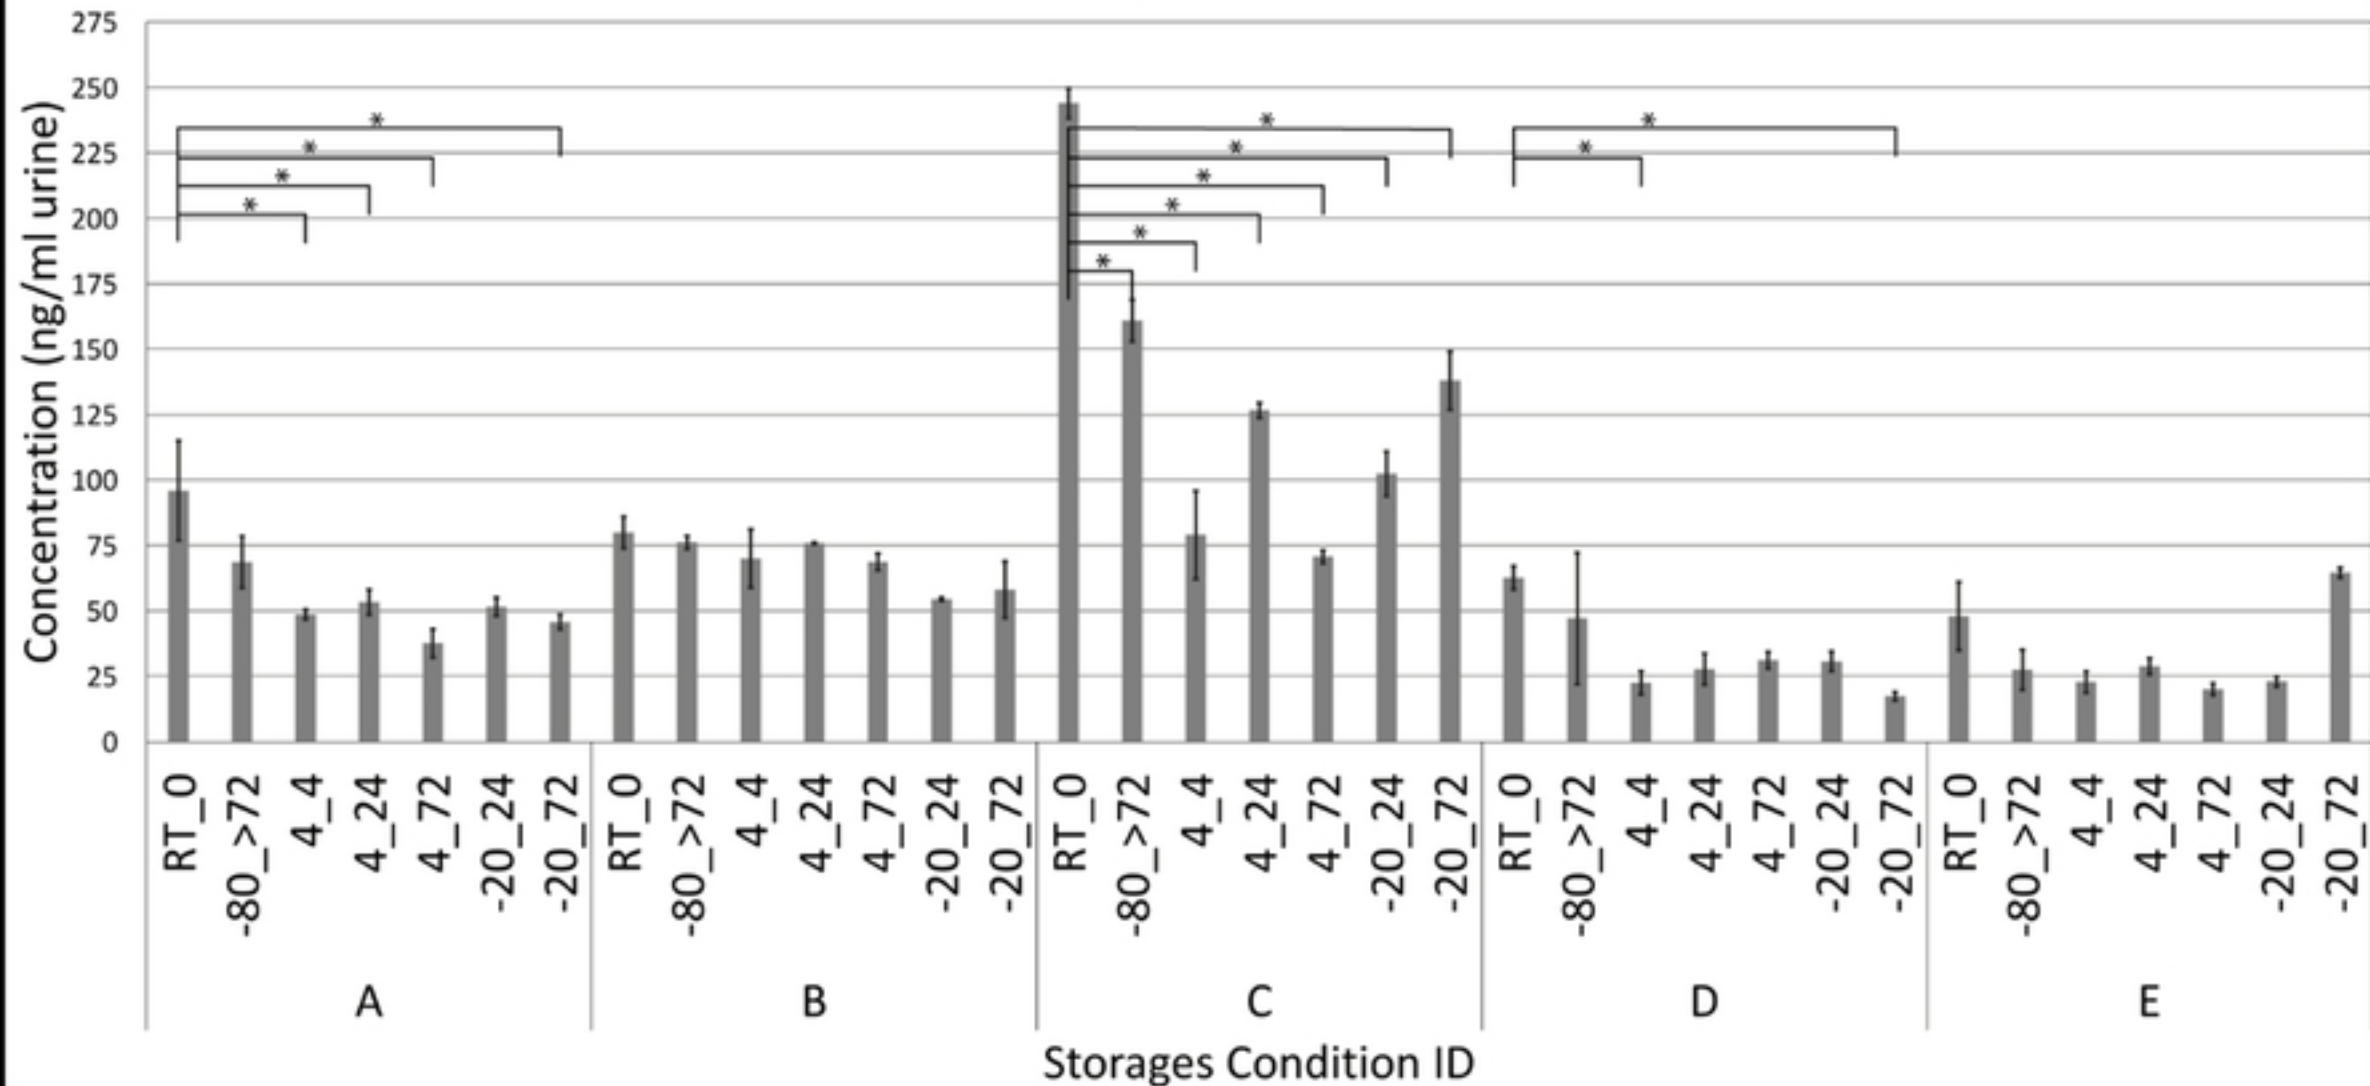

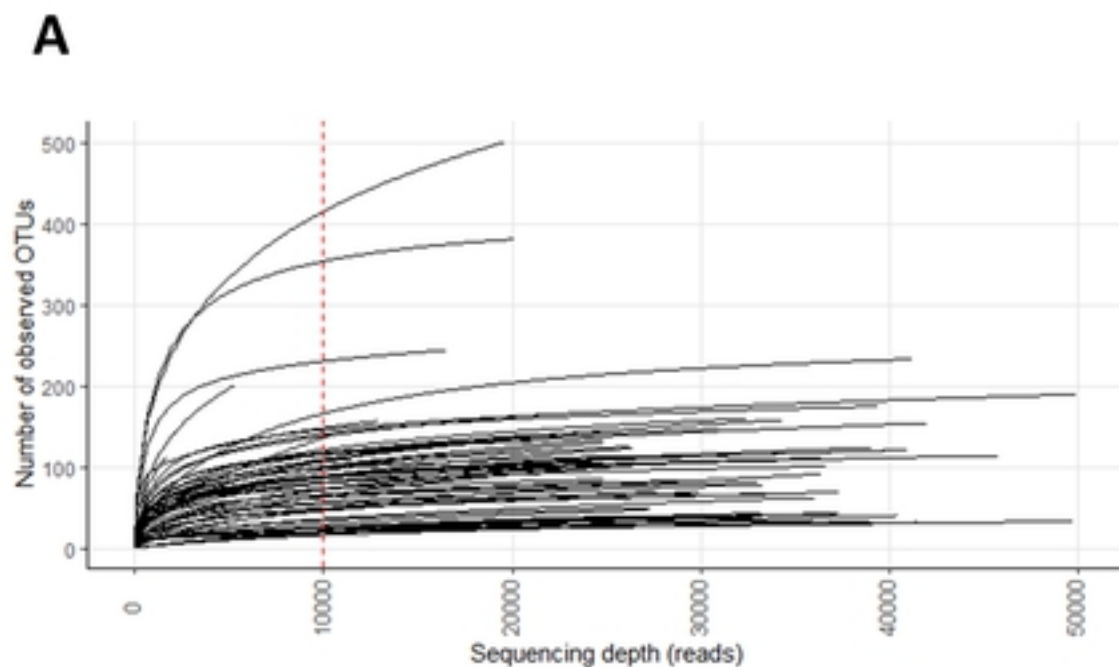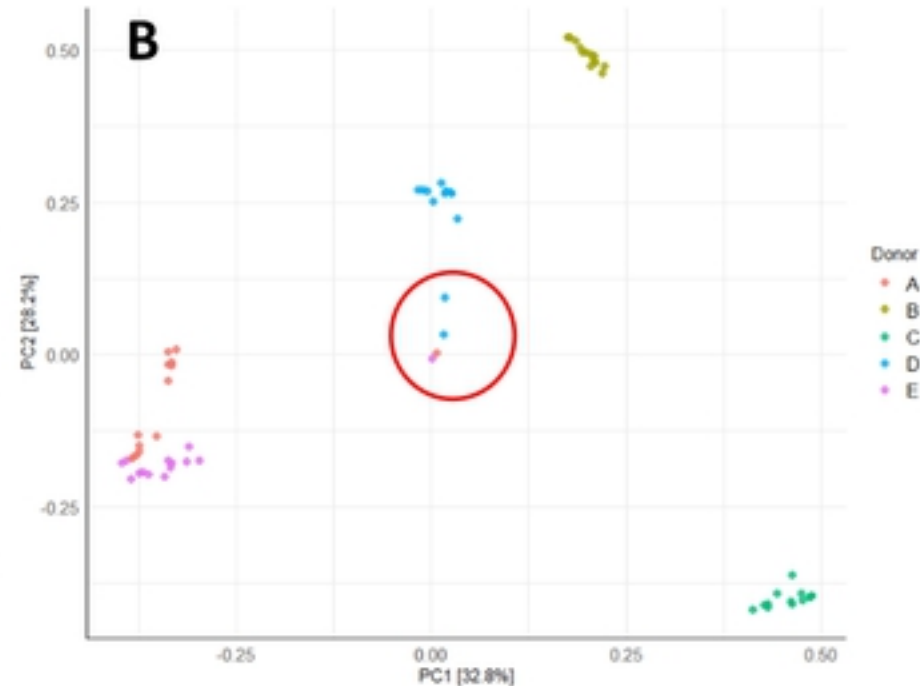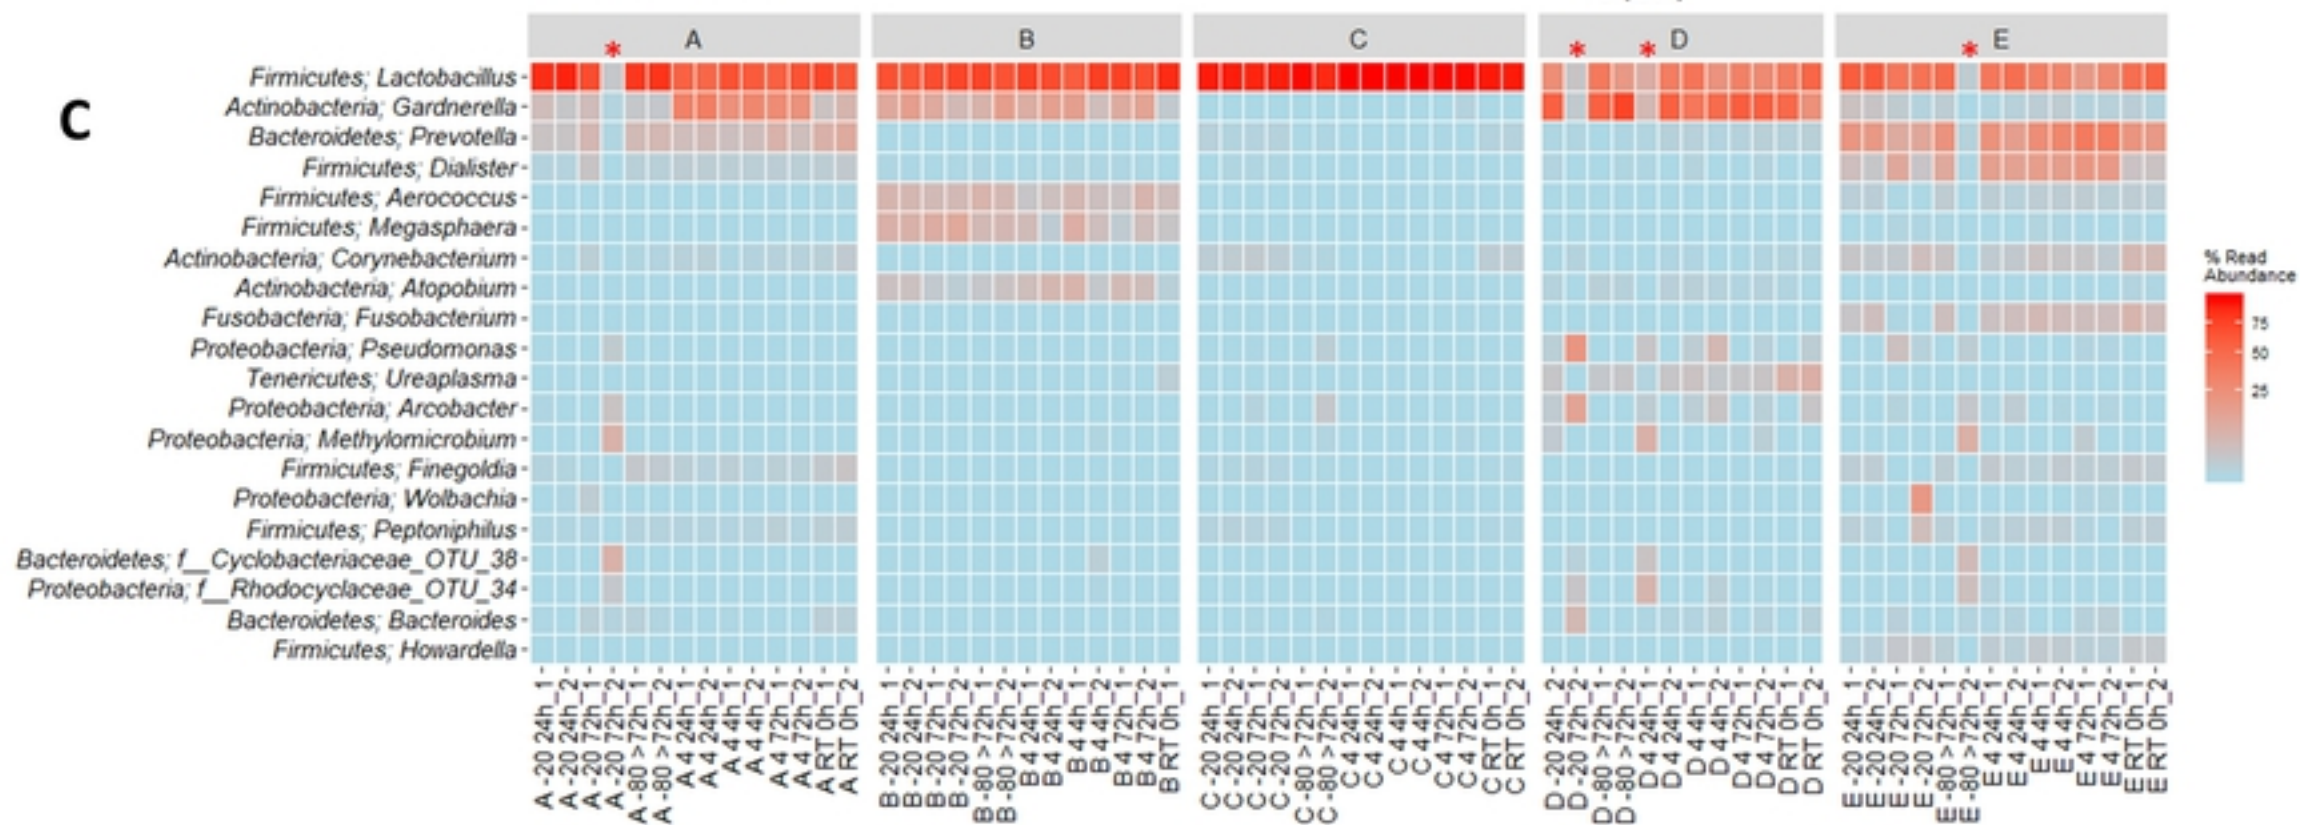

**A**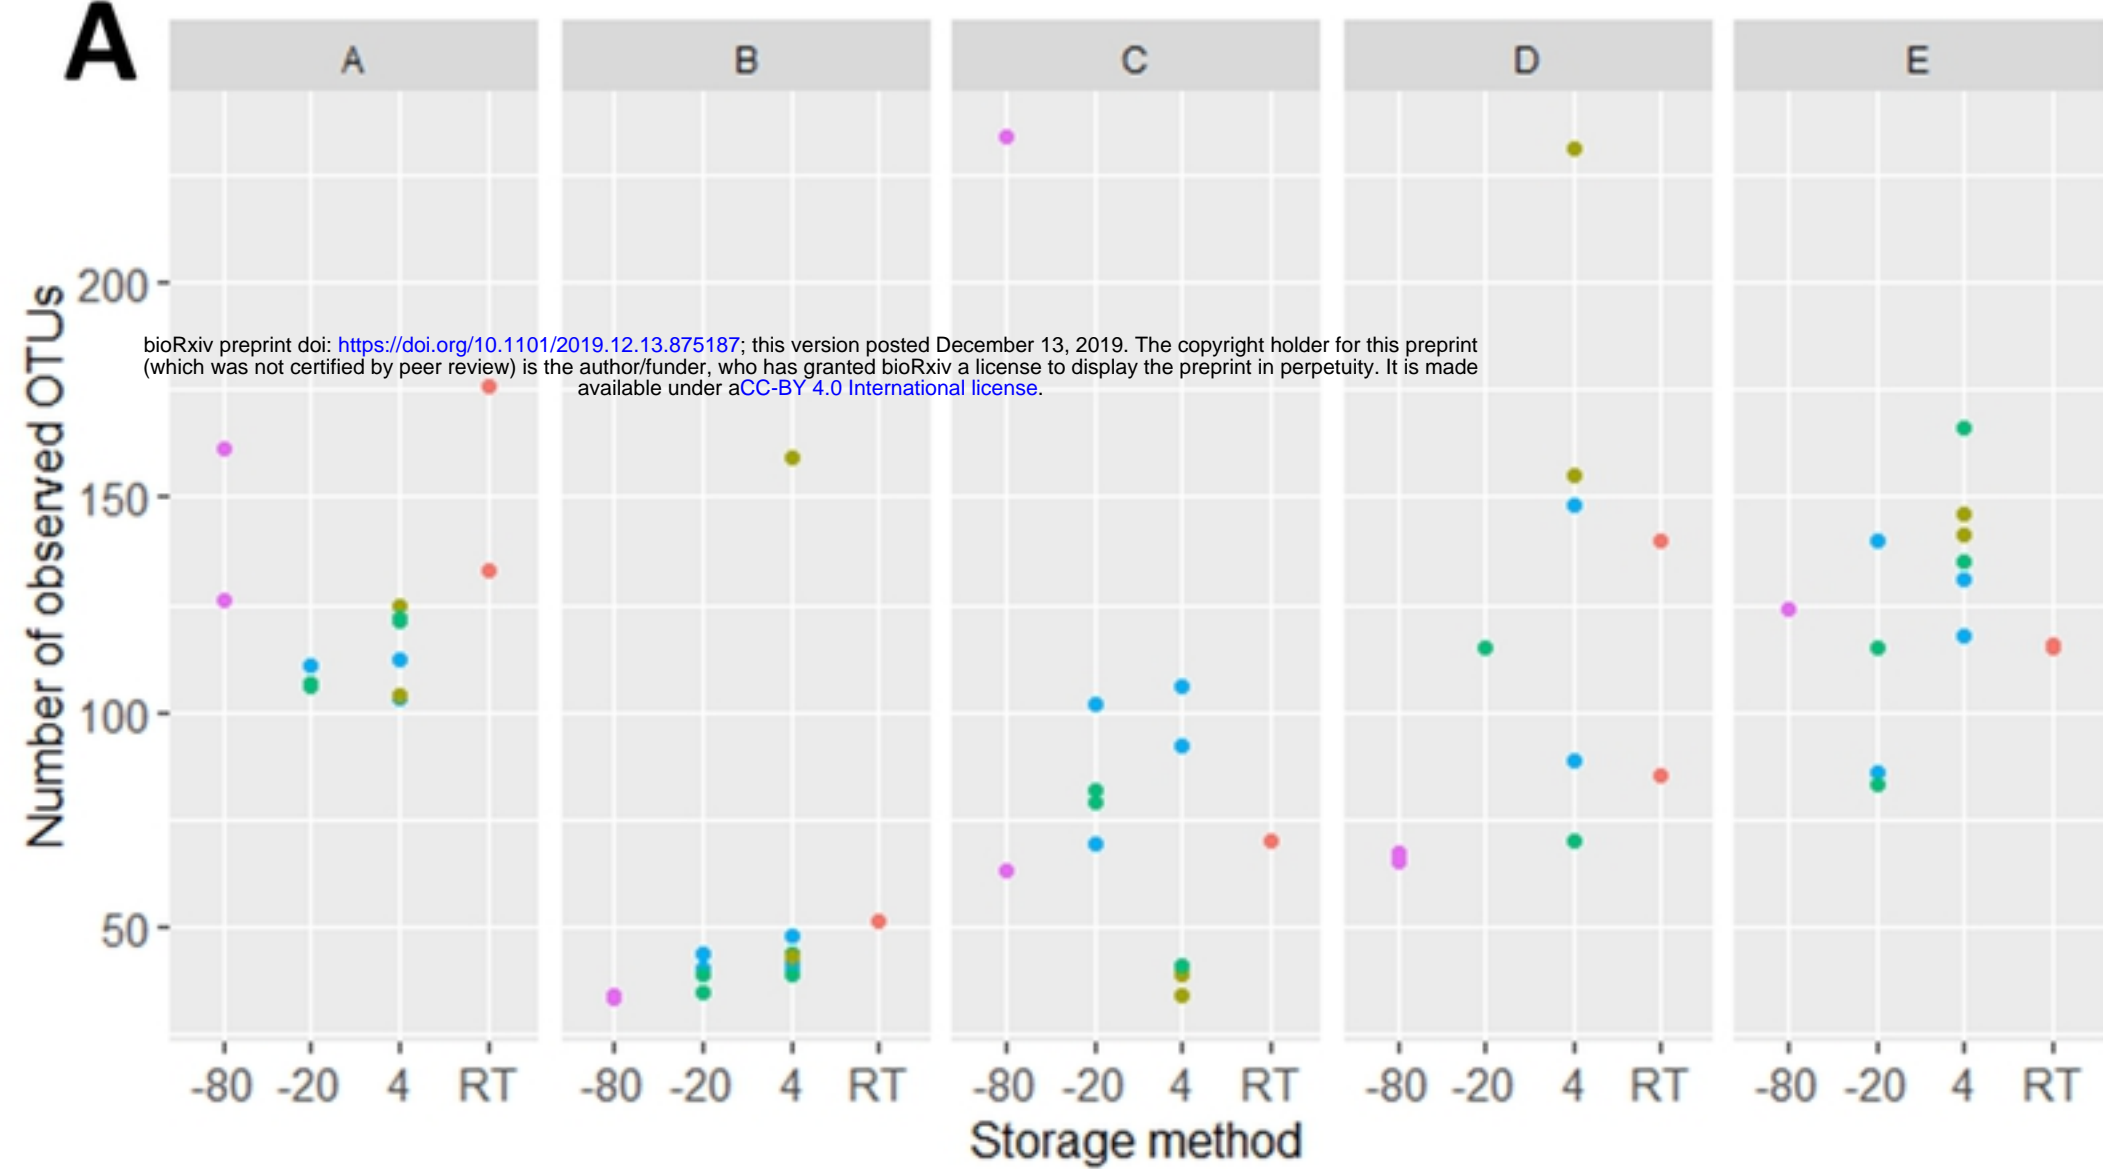**B**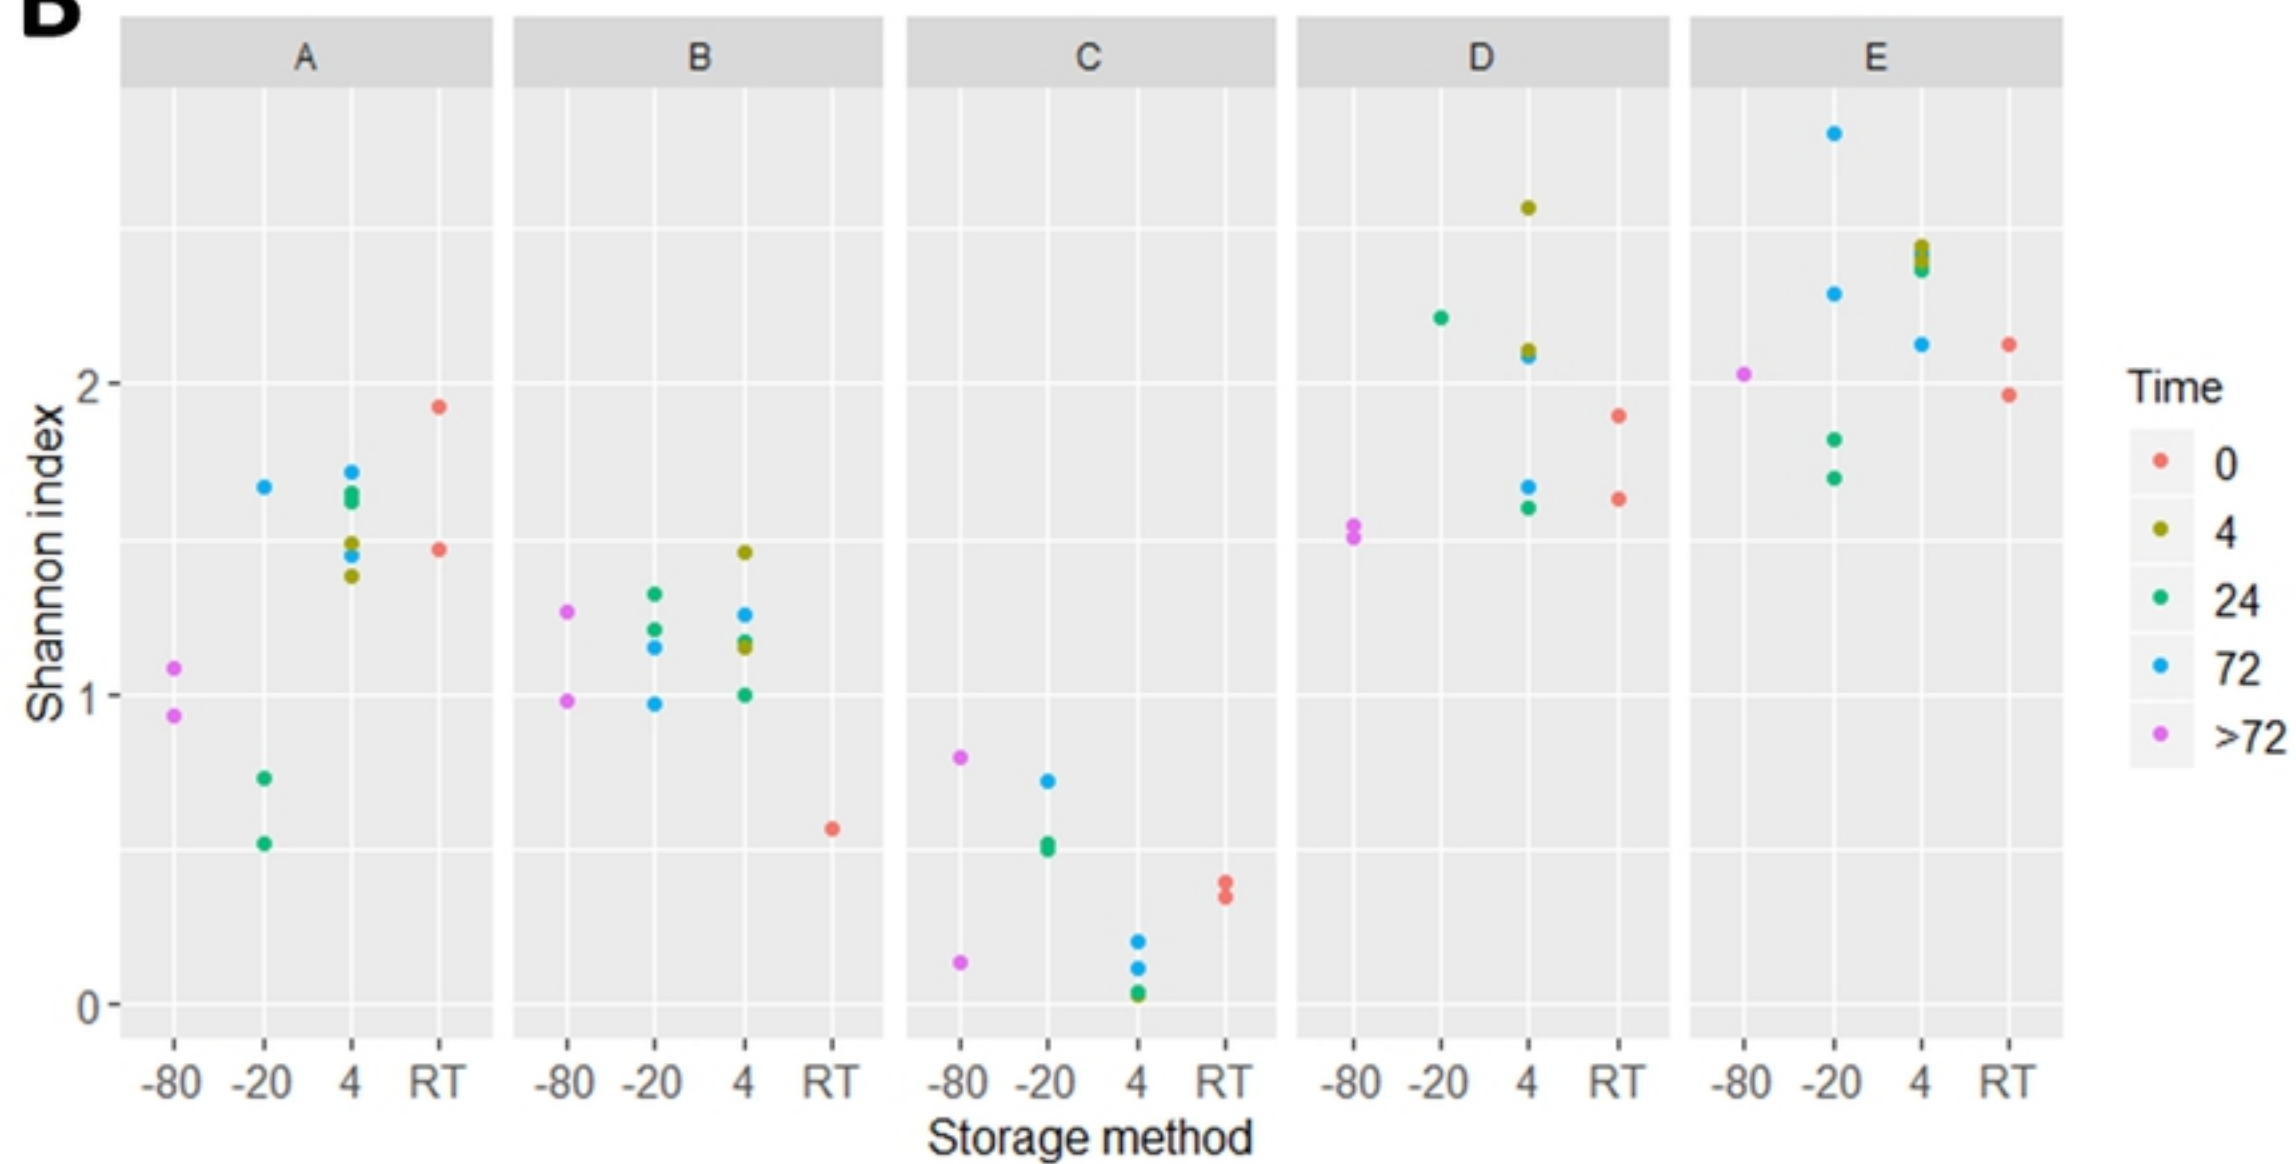

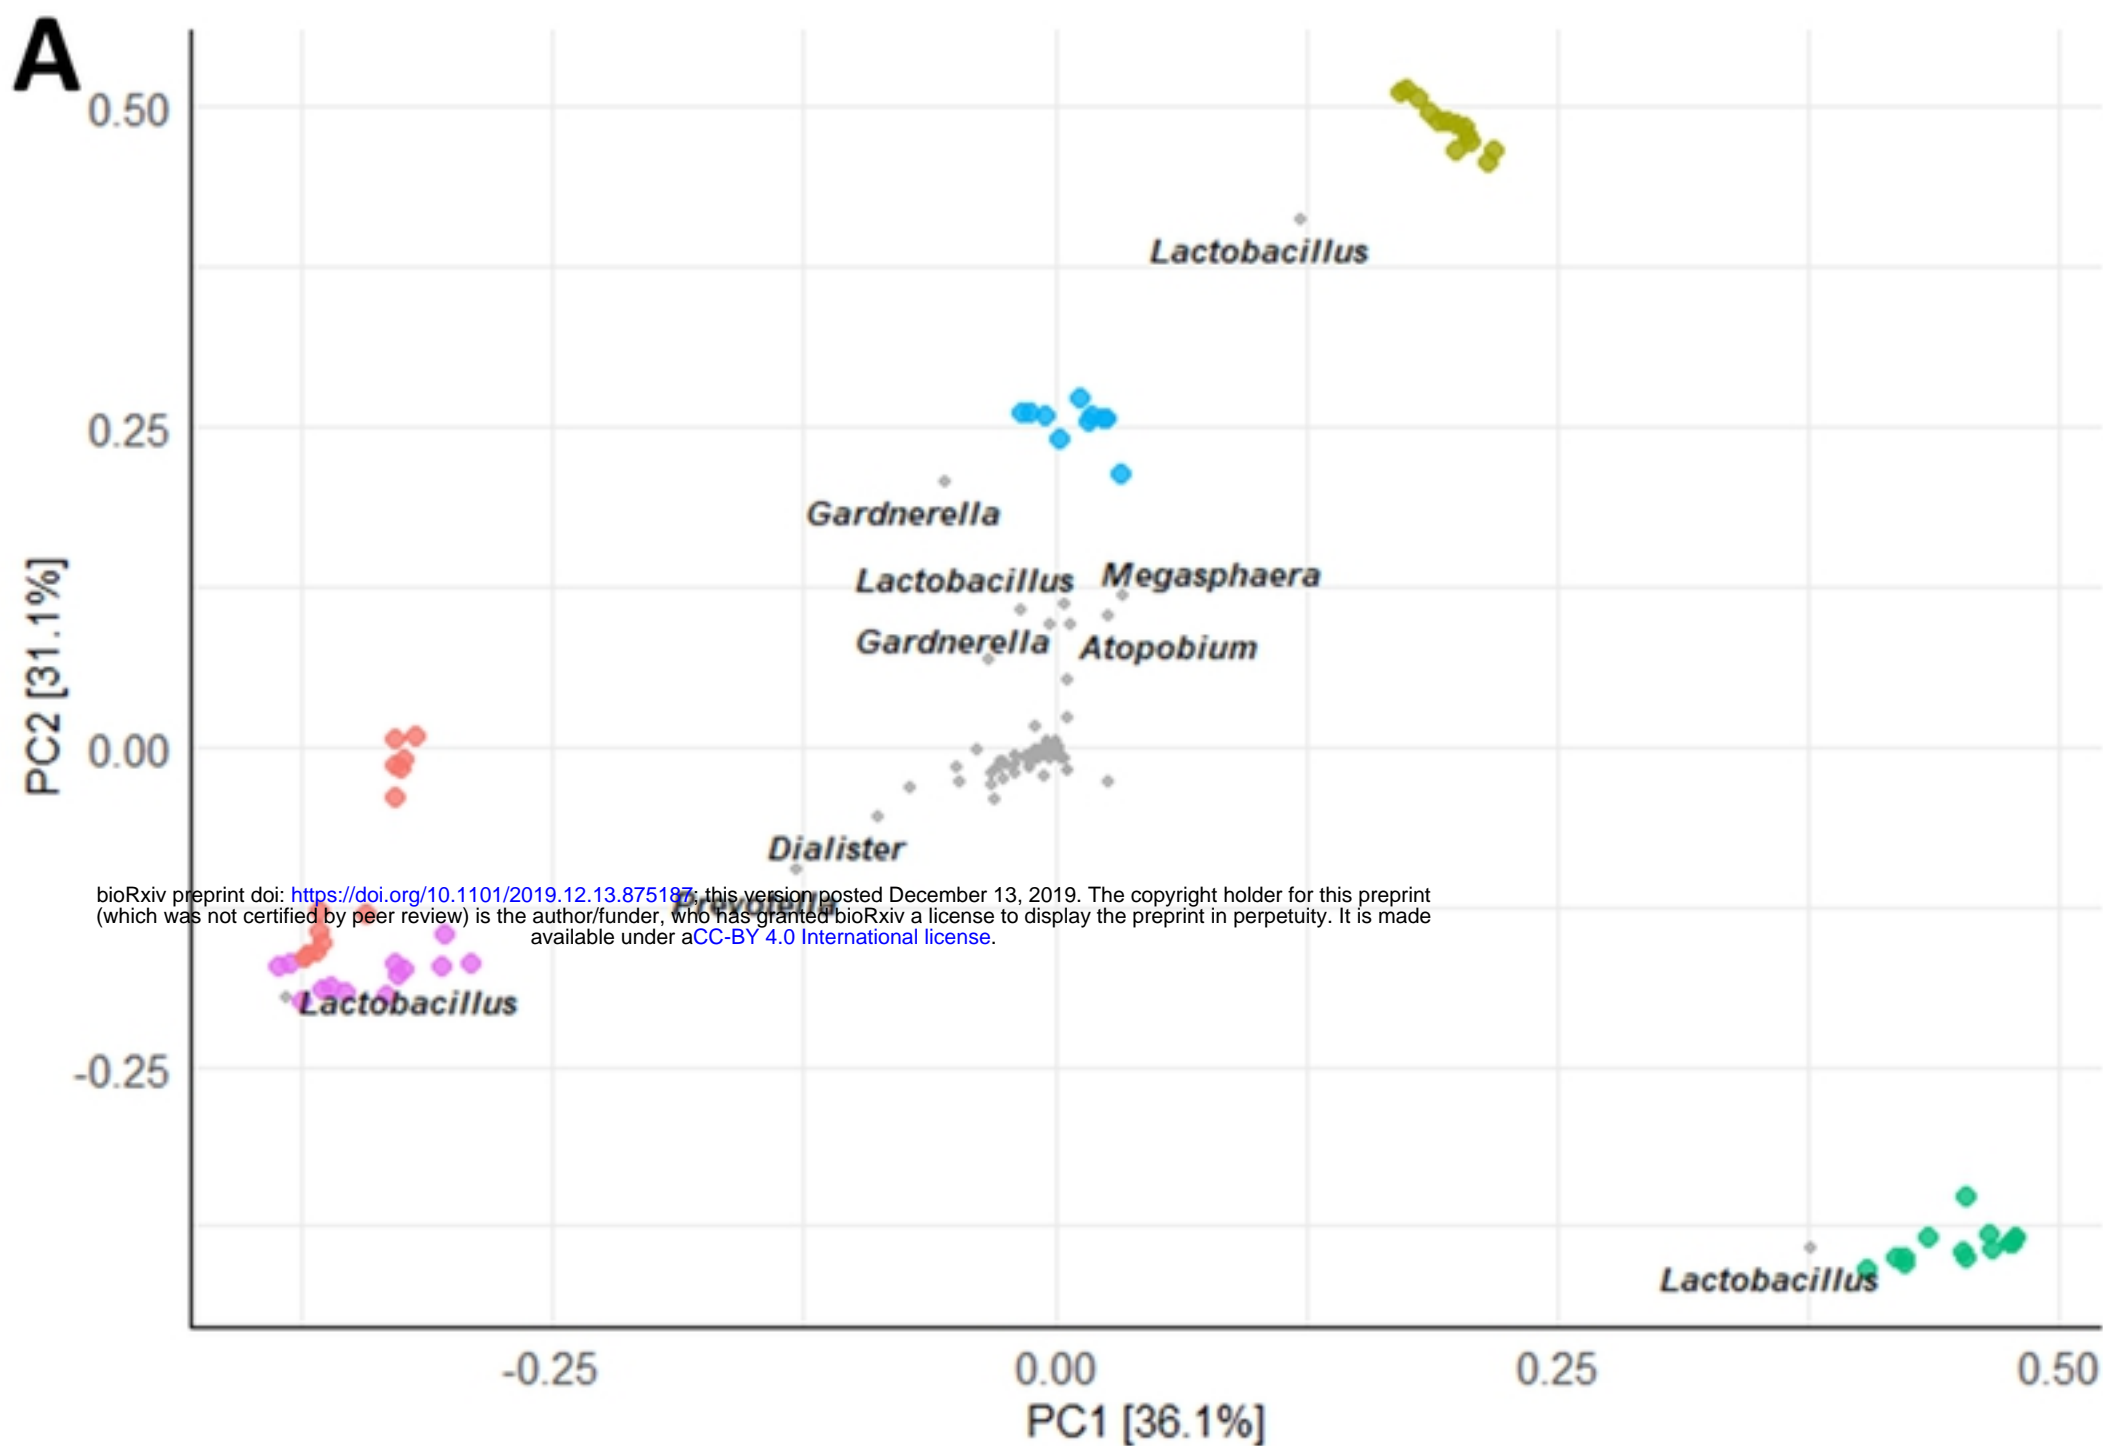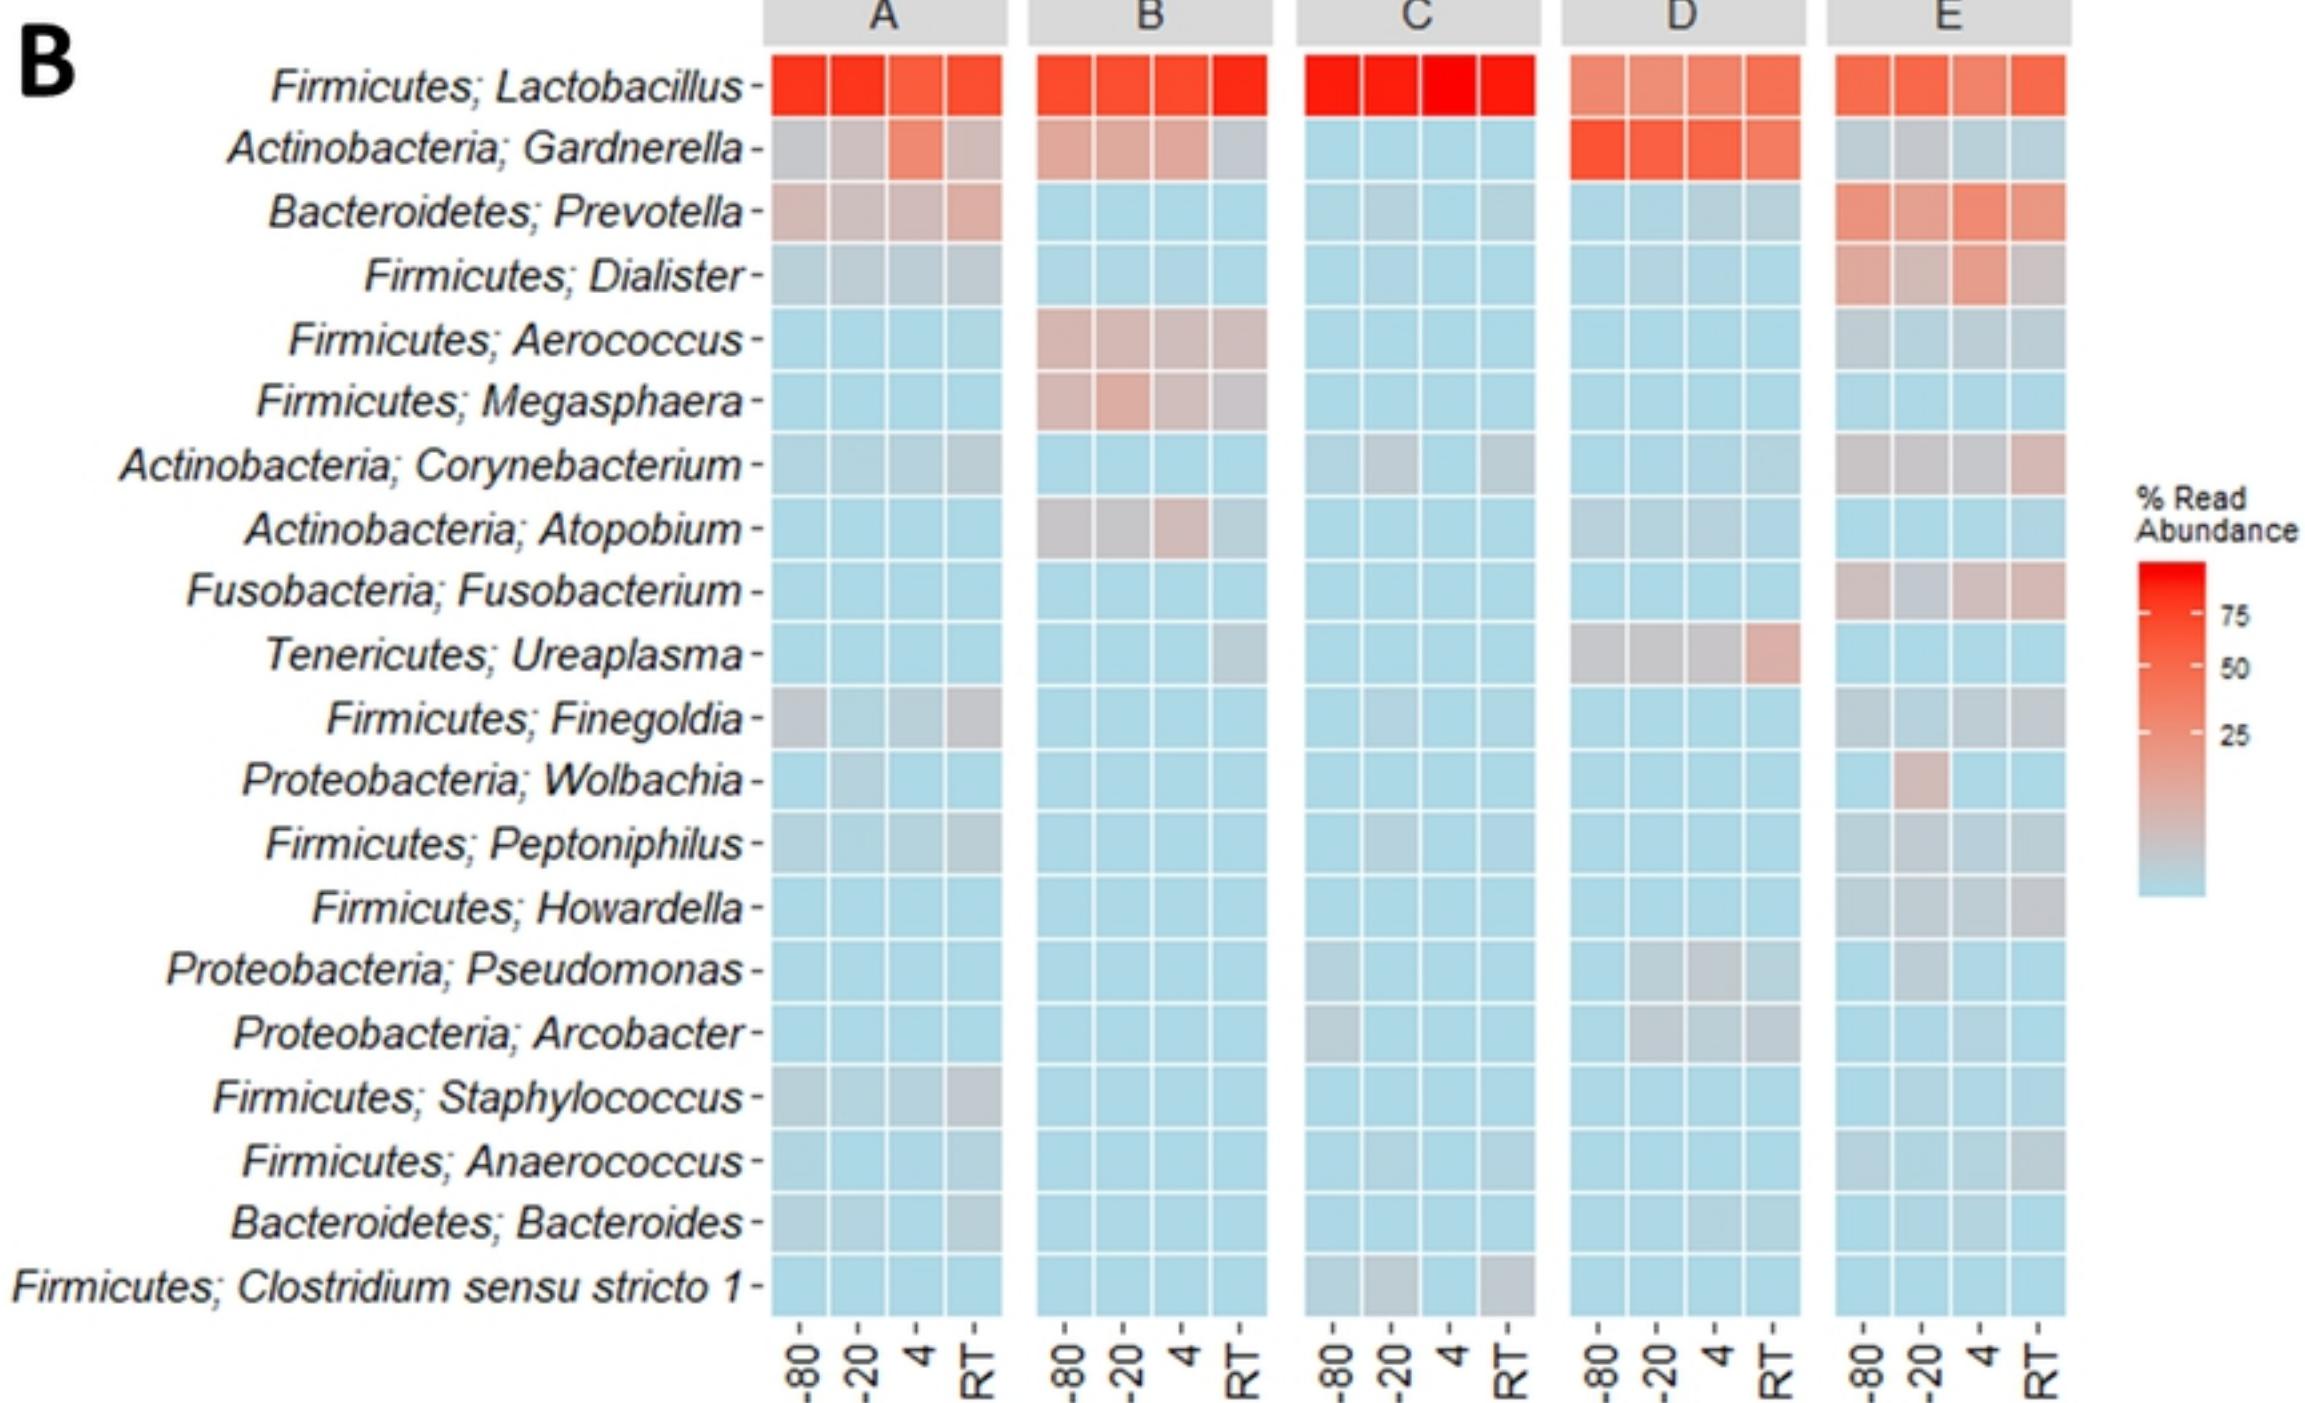

Source: https://biorxiv.org/content/biorxiv/early/2019/12/13/2019.12.13.875187.full-text.pdf
